# Supplementary material for: Oxygen surface exchange kinetics of La1−xSrxCoO3–δ thin-films decorated with binary oxides: links between acidity, strontium doping, and reaction kinetics
Source: Royal Society of Chemistry journal article supplement (doi:10.1039/d3ta07422f), 2024-01-01
Supplement: d3ta07422f1.xlsx [file d3ta07422f1.xlsx]

## Sheet: LSC82
	Deposited thickness (nm)	Chi-Sqr	Sum-Sqr	L1(+)	L1(Error)	L1(Error%)	YSZ(+)	YSZ(Error)	YSZ(Error%)	R1(+)	R1(Error)	R1(Error%)	CPE1-T(+)	CPE1-T(Error)	CPE1-T(Error%)	CPE1-P(+)	CPE1-P(Error)	CPE1-P(Error%)	R2(+)	R2(Error)	R2(Error%)	CPE2-T(+)	CPE2-T(Error)	CPE2-T(Error%)	CPE2-P(+)	CPE2-P(Error)	CPE2-P(Error%)	R3(+)	R3(Error)	R3(Error%)	CPE3-T(+)	CPE3-T(Error)	CPE3-T(Error%)	CPE3-P(+)	CPE3-P(Error)	CPE3-P(Error%)
GdC_95pls_5nm_LSC82_1nm_3_channel1.dat	1	7.2757e-06	0.00040744	6.3491e-06	2.0331e-08	0.32022	50.86	0.059126	0.11625	0			0			1			222.9	15.039	6.747	2.9612e-05	4.0498e-07	1.3676	0.92075	0.011617	1.2617	75.91	15.283	20.133	0.00039644	0.00011755	29.651	0.62982	0.02294	3.6423
GdC_95pls_5nm_LSC82_114pls_3nm_4_channel1.dat	3	1.8787e-06	0.00010709	6.4149e-06	1.0162e-08	0.15841	49.87	0.026579	0.053297	10.87	0.55997	5.1515	0.028371	0.0010496	3.6996	0.98977	0.029046	2.9346	45.03	5.6618	12.573	5.1234e-05	8.5363e-07	1.6661	0.95644	0.02099	2.1946	25.74	5.9713	23.199	0.00029538	3.3078e-05	11.198	0.66887	0.0074967	1.1208
GdC_95pls_5nm_LSC82_190pls_5nm_3_channel1.dat	5	3.0681e-06	0.00018102	6.4553e-06	1.3683e-08	0.21197	49.15	0.069781	0.14198	10.28	0.50767	4.9384	0.031248	0.0012549	4.0159	0.95708	0.024342	2.5434	20.21	0.93044	4.6039	8.3077e-05	4.2353e-06	5.098	0.97912	0.013615	1.3905	6.259	1.3082	20.901	0.0057038	0.0013419	23.526	0.43246	0.025584	5.9159
GdC_95pls_5nm_LSC82_380pls_10nm_3_channel1.dat	10	2.2964e-06	0.00013548	6.4536e-06	1.1857e-08	0.18373	47.27	0.085941	0.18181	9.349	0.68259	7.3012	0.033411	0.0018247	5.4614	0.97987	0.027254	2.7814	16.6	0.57693	3.4755	0.00014579	6.3636e-06	4.3649	0.98991	0.011309	1.1424	6.483	1.3124	20.244	0.018745	0.0047034	25.091	0.34036	0.029502	8.6679
GdC_95pls_5nm_LSC82_570pls_15nm_2_channel1.dat	15	1.8502e-06	0.00010916	6.4295e-06	1.0444e-08	0.16244	46.73	0.04794	0.10259	10.42	0.17998	1.7273	0.031796	0.00051888	1.6319	0.92511	0.012511	1.3524	17.57	0.20917	1.1905	0.00021906	5.7779e-06	2.6376	0.96074	0.0062553	0.65109	1.693	0.2031	11.996	0.0014513	0.00092683	63.862	0.59187	0.061616	10.41
GdC_95pls_5nm_LSC82_860pls_20nm_3_channel1.dat	20	2.9692e-06	0.00018112	6.452e-06	1.5711e-08	0.24351	50.79	0.22898	0.45084	10.07	1.346	13.366	0.030844	0.0030482	9.8826	0.95896	0.039149	4.0824	18.42	1.2041	6.5369	0.00025531	1.1769e-05	4.6097	0.97428	0.017743	1.8211	5.393	3.322	61.598	0.01818	0.018014	99.087	0.31113	0.091977	29.562
GdC_95pls_5nm_LSC82_1140pls_30nm_3_channel1.dat	30	1.9528e-06	0.00013084	6.4275e-06	1.1547e-08	0.17965	49.85	0.11089	0.22245	9.556	0.71658	7.4987	0.032456	0.0016472	5.0752	0.96063	0.024591	2.5599	13.9	0.54823	3.9441	0.00036012	1.2542e-05	3.4827	0.98117	0.011703	1.1928	4.7	1.5819	33.657	0.024644	0.011973	48.584	0.31102	0.047041	15.125
GdC_95pls_5nm_LSC82_1520pls_40nm_2_channel1.dat	40	3.0053e-06	0.00018333	6.465e-06	1.6944e-08	0.26209	47.72	0.44138	0.92494	9.873	0.8971	9.0864	0.03179	0.0018904	5.9465	0.96625	0.026817	2.7754	15.76	0.76891	4.8789	0.00051782	1.8998e-05	3.6688	0.95969	0.014377	1.4981	4.247	2.798	65.882	0.027512	0.034155	124.15	0.2619	0.12603	48.121
GdC_95pls_5nm_LSC82_1900pls_50nm_3_channel1.dat	50	2.2228e-06	0.00013559	6.4242e-06	1.27e-08	0.19769	46.51	0.12333	0.26517	9.991	0.21169	2.1188	0.032179	0.00070723	2.1978	0.96146	0.014428	1.5006	16.99	0.36981	2.1766	0.0006488	1.8277e-05	2.817	0.95456	0.0090649	0.94964	2.862	0.4983	17.411	0.0079852	0.004897	61.326	0.39353	0.062519	15.887
Active surface (cm²)		number of pulses	thickness (nm)	R	Cchem		PO2 (mbar)	T (K)	R	Cchem	ASR	kq	Co (Cchem)			1000/T	T(K)	T(°C)	C	R	kq	Co (Cchem)
0.14398		38	1	222.9	1.92219e-05		0.01	881.997	40.13	0.000666436	5.6182	5.82298e-08	5.07535e+22			1.12841	886.2	613.2	0.000543153	34.18	6.86921e-08	5.07521e+22
Co (dop)		114	3	45.03	3.88563e-05		0.04	884.04	16.99	0.000523502	2.3786	1.37856e-07	5.07519e+22			1.18801	841.747	568.747	0.000395736	78.3	2.84818e-08	5.075e+22
5.07396e+22		190	5	20.21	7.24944e-05		0.1	886.298	10.07	0.000462331	1.4098	2.33183e-07	5.07512e+22			1.20916	827.023	554.023	0.000363868	103.7	2.11293e-08	5.07495e+22
Cv (dop)		380	10	16.6	0.000137108		1	887.112	3.34	0.000324454	0.4676	7.03686e-07	5.07493e+22			1.28683	777.104	504.104	0.000284873	313.8	6.56105e-09	5.07481e+22
8.59993e+20		570	15	17.57	0.000174538		10	876.052	3.225	0.000312955	0.4515	7.19693e-07	5.07491e+22
		760	20	18.42	0.000221626		100	896.964	1.561	5.03861e-05	0.21854	1.52237e-06	5.07434e+22
		1140	30	13.9	0.00032531
		1520	40	15.76	0.000423122
		1900	50	16.99	0.000523502
	pO2 (mbar)	Chi-Sqr	Sum-Sqr	L1(+)	L1(Error)	L1(Error%)	YSZ(+)	YSZ(Error)	YSZ(Error%)	R1(+)	R1(Error)	R1(Error%)	CPE1-T(+)	CPE1-T(Error)	CPE1-T(Error%)	CPE1-P(+)	CPE1-P(Error)	CPE1-P(Error%)	R2(+)	R2(Error)	R2(Error%)	CPE2-T(+)	CPE2-T(Error)	CPE2-T(Error%)	CPE2-P(+)	CPE2-P(Error)	CPE2-P(Error%)	R3(+)	R3(Error)	R3(Error%)	CPE3-T(+)	CPE3-T(Error)	CPE3-T(Error%)	CPE3-P(+)	CPE3-P(Error)	CPE3-P(Error%)
GdC_95pls_5nm_LSC82_1900pls_50nm_0,01mbar_2_channel1.dat	0.01	4.2968e-06	0.00027929	6.4247e-06	1.9405e-08	0.30204	47.61	0.5233	1.0991	32.23	0.94757	2.94	0.031746	0.00087557	2.758	0.96256	0.010912	1.1336	40.13	0.85042	2.1192	0.00078034	1.1073e-05	1.419	0.95643	0.0071466	0.74722	4.282	3.2711	76.392	0.044793	0.053918	120.37	0.23195	0.13376	57.668
GdC_95pls_5nm_LSC82_1900pls_50nm_3_channel1.dat	0.04	2.2228e-06	0.00013559	6.4242e-06	1.27e-08	0.19769	46.51	0.12333	0.26517	9.991	0.21169	2.1188	0.032179	0.00070723	2.1978	0.96146	0.014428	1.5006	16.99	0.36981	2.1766	0.0006488	1.8277e-05	2.817	0.95456	0.0090649	0.94964	2.862	0.4983	17.411	0.0079851	0.004897	61.327	0.39353	0.062519	15.887
GdC_95pls_5nm_LSC82_1900pls_50nm_0,1mbar_2_channel1.dat	0.1	2.0212e-06	0.00011117	6.4064e-06	1.1014e-08	0.17192	45.34	0.069415	0.1531	4.576	0.25118	5.4891	0.033608	0.001571	4.6745	0.94881	0.03402	3.5855	10.07	0.51345	5.0988	0.00056168	3.0016e-05	5.344	0.96375	0.017497	1.8155	2.179	0.61076	28.029	0.0077295	0.0063868	82.629	0.46087	0.080472	17.461
GdC_95pls_5nm_LSC82_1900pls_50nm_1mbar_3_channel1.dat	1	2.0388e-06	9.9899e-05	6.3873e-06	1.0359e-08	0.16218	44.93	0.039853	0.0887	1.266	0.5412	42.749	0.0012677	0.0014857	117.2	0.66313	0.11174	16.85	3.34	0.69239	20.73	0.00051401	0.0001544	30.038	0.93261	0.071837	7.7028	0.53446	0.30387	56.856	0.039974	0.021298	53.28	0.96222	0.25068	26.052
GdC_95pls_5nm_LSC82_1900pls_50nm_10mbar_2_channel1.dat	10	8.8398e-07	3.8895e-05	6.319e-06	7.5207e-09	0.11902	51.05	0.035144	0.068842	2.474	0.76678	30.994	0.0029232	0.0015748	53.872	0.54066	0.049021	9.0669	3.225	0.66153	20.513	0.00038739	6.1369e-05	15.842	0.96907	0.053538	5.5247	0			0			1
GdC_95pls_5nm_LSC82_1900pls_50nm_100mbar_2_channel1.dat	100	5.9372e-06	0.00037404	6.3599e-06	3.0504e-08	0.47963	40.4	385.7	954.7	20.37	423.95	2081.2	0.011509	0.40194	3492.4	0.039901	0.49779	1247.6	1.561	1.3625	87.284	0.00024523	0.00055972	228.24	0.83255	0.25808	30.999	3.17	1.2277	38.729	0.00017789	6.1998e-05	34.852	1.011	0.099003	9.7926
	T (K)	Chi-Sqr	Sum-Sqr	L1(+)	L1(Error)	L1(Error%)	YSZ(+)	YSZ(Error)	YSZ(Error%)	R1(+)	R1(Error)	R1(Error%)	CPE1-T(+)	CPE1-T(Error)	CPE1-T(Error%)	CPE1-P(+)	CPE1-P(Error)	CPE1-P(Error%)	R2(+)	R2(Error)	R2(Error%)	CPE2-T(+)	CPE2-T(Error)	CPE2-T(Error%)	CPE2-P(+)	CPE2-P(Error)	CPE2-P(Error%)	R3(+)	R3(Error)	R3(Error%)	CPE3-T(+)	CPE3-T(Error)	CPE3-T(Error%)	CPE3-P(+)	CPE3-P(Error)	CPE3-P(Error%)
GdC_95pls_5nm_LSC82_1900pls_50nm_T1_2_channel1.dat	886.2	1.1314e-06	7.1279e-05	6.408e-06	8.3695e-09	0.13061	45.39	0.069262	0.15259	3.071	0.48797	15.89	0.01656	0.0067972	41.046	0.36886	0.042928	11.638	34.18	0.38042	1.113	0.00061915	6.3741e-06	1.0295	0.96715	0.0041683	0.43099	11.85	0.22503	1.899	0.03006	0.00068713	2.2859	0.98025	0.01111	1.1334
GdC_95pls_5nm_LSC82_1900pls_50nm_T2_2_channel1.dat	841.747	3.0265e-06	0.00019672	6.3634e-06	2.2516e-08	0.35384	80.46	0.57185	0.71073	13.14	3.3916	25.811	0.023079	0.0074127	32.119	0.19916	0.038737	19.45	78.3	0.80938	1.0337	0.00044571	5.738e-06	1.2874	0.96577	0.0042778	0.44294	8.802	1.0103	11.478	0.034298	0.0035103	10.235	1.11	0.050575	4.5563
GdC_95pls_5nm_LSC82_1900pls_50nm_T3_2_channel1.dat	827.023	2.6447e-06	0.00017191	6.2387e-06	2.4596e-08	0.39425	100.6	0.42803	0.42548	15.46	3.2235	20.851	0.018133	0.0049429	27.259	0.2242	0.031838	14.201	103.7	1.0667	1.0286	0.00040467	4.6375e-06	1.146	0.96757	0.0040803	0.42171	7.745	1.1784	15.215	0.037786	0.0054505	14.425	1.147	0.065007	5.6676
GdC_95pls_5nm_LSC82_1900pls_50nm_T4_2_channel1.dat	777.104	9.5531e-06	0.00063051	4.7258e-06	1.0171e-07	2.1522	243.9	1.091	0.44731	37.23	11.853	31.837	0.0084063	0.003112	37.02	0.24345	0.042884	17.615	313.8	4.5439	1.448	0.00030455	2.6218e-06	0.86088	0.97234	0.0059983	0.61689	0			0			1
														Change of pO2
														PO2 (mbar)	Co (Cchem)	Cv (Cchem)	Co variation (%)	Cv variation (%)
				LSC82	Change of Temperature								LSC82	0.01	5.07535e+22	8.73865e+20	0.0273395	1.61303
					1000/T	Co (Cchem)	Cv (Cchem)	Co variation (%)	Cv variation					0.04	5.07519e+22	8.72302e+20	0.024259	1.43128
					1.12841	5.07521e+22	8.72546e+20	0.0247342	1.43868					0.1	5.07512e+22	8.71575e+20	0.0228268	1.34678
					1.18801	5.075e+22	8.70436e+20	0.020577	1.19972					1	5.07493e+22	8.697e+20	0.0191313	1.12874
					1.20916	5.07495e+22	8.69919e+20	0.019558	1.14098					10	5.07491e+22	8.69467e+20	0.0186717	1.10163
					1.28683	5.07481e+22	8.68506e+20	0.0167753	0.980205					100	5.07434e+22	8.6384e+20	0.0075809	0.447273
													LSC91	0.01	5.11786e+22	4.39031e+20	0.0176555	2.101
														0.04	5.11779e+22	4.38262e+20	0.0161524	1.92213
														0.1	5.11776e+22	4.38017e+20	0.0156734	1.86514
														1	5.11776e+22	4.38027e+20	0.0156935	1.86753
														10	5.11749e+22	4.35278e+20	0.0103224	1.22836
														100	5.11746e+22	4.35008e+20	0.00979305	1.16537
													LSC95	0.01	5.13942e+22	2.2456e+20	0.0186085	4.44743
														0.04	5.13936e+22	2.23967e+20	0.0174542	4.17155
														0.1	5.13931e+22	2.23516e+20	0.0165755	3.96156
														1	5.13923e+22	2.22701e+20	0.0149902	3.58266
														10	5.13927e+22	2.23111e+20	0.0157877	3.77327
														100	5.13919e+22	2.22268e+20	0.0141477	3.38129
																								5.11696e+22

## Sheet: LSC82-CaO
	deposited thickness (nm)	Chi-Sqr	Sum-Sqr	L1(+)	L1(Error)	L1(Error%)	YSZ(+)	YSZ(Error)	YSZ(Error%)	R1(+)	R1(Error)	R1(Error%)	CPE1-T(+)	CPE1-T(Error)	CPE1-T(Error%)	CPE1-P(+)	CPE1-P(Error)	CPE1-P(Error%)	R2(+)	R2(Error)	R2(Error%)	CPE2-T(+)	CPE2-T(Error)	CPE2-T(Error%)	CPE2-P(+)	CPE2-P(Error)	CPE2-P(Error%)	R3(+)	R3(Error)	R3(Error%)	CPE3-T(+)	CPE3-T(Error)	CPE3-T(Error%)	CPE3-P(+)	CPE3-P(Error)	CPE3-P(Error%)
GdC_95pls_5nm_LSC82_50nm_CaOCO3_restoration_20nm_CaO_0pls_2_channel1.dat	0	2.4108e-06	0.00014706	6.407e-06	1.4152e-08	0.22088	50.08	1.4356	2.8666	28.5	0.39844	1.398	0.0008812	1.6407e-05	1.8619	0.9635	0.0058129	0.60331	9.379	0.80161	8.5469	0.034617	0.001738	5.0207	1.029	0.034535	3.3562	109.6	1399.6	1277	0.1374	0.081962	59.652	0.085485	0.070396	82.349
GdC_95pls_5nm_LSC82_50nm_CaOCO3_restoration_20nm_CaO_21pls_0.135nm_2_channel1.dat	0.133758	1.9975e-06	0.00012185	6.4246e-06	1.3579e-08	0.21136	50.03	0.5959	1.1911	29.82	0.48231	1.6174	0.00090715	1.4431e-05	1.5908	0.9553	0.0058289	0.61016	10.84	0.82181	7.5813	0.032339	0.0015757	4.8724	0.99699	0.026809	2.689	6.178	4.0073	64.864	0.057286	0.04116	71.85	0.17973	0.083737	46.59
GdC_95pls_5nm_LSC82_50nm_CaOCO3_restoration_20nm_CaO_42pls_0.269nm_3_channel1.dat	0.267516	1.991e-06	0.00012145	6.4249e-06	1.3603e-08	0.21172	50.36	0.70484	1.3996	34.3	0.50394	1.4692	0.00092769	1.3295e-05	1.4331	0.9507	0.0052713	0.55447	10.37	0.87851	8.4716	0.033838	0.0019472	5.7545	1.004	0.030706	3.0584	6.986	5.0518	72.313	0.063006	0.043747	69.433	0.16412	0.082819	50.462
GdC_95pls_5nm_LSC82_50nm_CaOCO3_restoration_20nm_CaO_63pls_0.404nm_2_channel1.dat	0.401274	2.0779e-06	0.00012675	6.4307e-06	1.4196e-08	0.22075	49.63	0.73493	1.4808	39.89	0.62196	1.5592	0.00096117	1.2229e-05	1.2723	0.94491	0.0052844	0.55925	10.02	0.80616	8.0455	0.036152	0.002344	6.4837	1.013	0.030754	3.0359	6.017	4.1318	68.669	0.055993	0.042854	76.535	0.17433	0.092851	53.262
GdC_95pls_5nm_LSC82_50nm_CaOCO3_restoration_20nm_CaO_84pls_0.538nm_2_channel1.dat	0.535032	4.2454e-06	0.00025897	6.4119e-06	1.8226e-08	0.28425	49.99	0.20275	0.40558	47.91	1.0304	2.1507	0.00097862	1.6728e-05	1.7093	0.93564	0.0073864	0.78945	10.14	0.84394	8.3229	0.037346	0.0038367	10.273	1.041	0.037632	3.615	3.615	0.80931	22.388	0.013377	0.0087483	65.398	0.34019	0.07134	20.971
GdC_95pls_5nm_LSC82_50nm_CaOCO3_restoration_20nm_CaO_105pls_0.673nm_2_channel1.dat	0.66879	8.9916e-07	5.4849e-05	6.4047e-06	8.3258e-09	0.13	50.01	0.089863	0.17969	57.19	0.6572	1.1492	0.00099585	6.6985e-06	0.67264	0.93568	0.0032515	0.3475	8.881	0.59566	6.7071	0.043707	0.0037996	8.6933	1.009	0.025878	2.5647	3.193	0.3587	11.234	0.015332	0.005036	32.846	0.34105	0.036019	10.561
Active surface (cm²)		number of pulses	deposited thickness (nm)	R	Cchem	kq	Co (Cchem)	T (K)			PO2	T (K)	R	Cchem	ASR	kq	Co (Cchem)		1000/T	T(K)	T(°C)	C	R	kq	Co (Cchem)
0.14398		0	0	28.5	0.000766406	8.1565e-08	5.07544e+22	877.664			0.01	874.836	149.4	0.00105982	21.5106	1.5514e-08	5.0757e+22		1.16821	856.008	583.008	0.00105384	48.55	4.67128e-08	5.07568e+22
Co (dop)		21	0.133758	29.82	0.000766159	7.7962e-08	5.07544e+22	877.749			0.04	877.783	57.19	0.000817798	8.23422	4.06644e-08	5.07549e+22		1.22547	816.013	543.013	0.000599365	188.6	1.14631e-08	5.07522e+22
5.07396e+22		42	0.267516	34.3	0.000775815	6.77363e-08	5.07545e+22	877.194			0.1	874.949	37.79	0.000698695	5.44101	6.13413e-08	5.07537e+22		1.24592	802.62	529.62	0.000551543	275.1	7.72977e-09	5.07516e+22
Cv (dop)		63	0.401274	39.89	0.00079474	5.83261e-08	5.07547e+22	878.429			1	882.492	11.58	0.000548374	1.66729	2.01906e-07	5.07522e+22		1.29159	774.241	501.241	0.000477544	603.2	3.40065e-09	5.07506e+22
8.59993e+20		84	0.535032	47.91	0.000792864	4.85286e-08	5.07547e+22	877.816			10	874.533	8.782	0.000438619	1.26443	2.63833e-07	5.07508e+22
		105	0.66879	57.19	0.000817798	4.06525e-08	5.07549e+22	877.783			100	872.178	4.965	0.000296982	0.714861	4.65407e-07	5.07488e+22
	pO2 (mbar)	Chi-Sqr	Sum-Sqr	L1(+)	L1(Error)	L1(Error%)	YSZ(+)	YSZ(Error)	YSZ(Error%)	R1(+)	R1(Error)	R1(Error%)	CPE1-T(+)	CPE1-T(Error)	CPE1-T(Error%)	CPE1-P(+)	CPE1-P(Error)	CPE1-P(Error%)	R2(+)	R2(Error)	R2(Error%)	CPE2-T(+)	CPE2-T(Error)	CPE2-T(Error%)	CPE2-P(+)	CPE2-P(Error)	CPE2-P(Error%)	R3(+)	R3(Error)	R3(Error%)	CPE3-T(+)	CPE3-T(Error)	CPE3-T(Error%)	CPE3-P(+)	CPE3-P(Error)	CPE3-P(Error%)
GdC_95pls_5nm_LSC82_50nm_CaOCO3_restoration_20nm_CaO_105pls_0.673nm_0.01mbar_2_channel1.dat	0.01	1.2882e-06	7.214e-05	6.4777e-06	6.038e-08	0.93212	51.8	0.10225	0.19739	29.58	0.45484	1.5377	0.04908	0.0016458	3.3533	1	0	0	2.632	0.18514	7.0342	0.0044153	0.0013299	30.12	0.46074	0.037925	8.2313	149.4	0.57963	0.38797	0.0012596	3.6004e-06	0.28584	0.9063	0.0013582	0.14986
GdC_95pls_5nm_LSC82_50nm_CaOCO3_restoration_20nm_CaO_105pls_0.673nm_2_channel1.dat	0.04	8.9916e-07	5.4849e-05	6.4047e-06	8.3258e-09	0.13	50.01	0.089863	0.17969	3.193	0.3587	11.234	0.015332	0.005036	32.846	0.34105	0.036019	10.561	8.881	0.59566	6.7071	0.043707	0.0037996	8.6933	1.009	0.025878	2.5647	57.19	0.6572	1.1492	0.00099585	6.6985e-06	0.67264	0.93568	0.0032515	0.3475
GdC_95pls_5nm_LSC82_50nm_CaOCO3_restoration_20nm_CaO_105pls_0.673nm_0.1mbar_2_channel1.dat	0.1	2.2814e-06	0.00010266	6.3543e-06	8.4139e-08	1.3241	51.73	0.21154	0.40893	3.234	2.2439	69.385	0.064695	0.032118	49.645	0.97645	0.28697	29.389	2.542	0.99978	39.33	0.017532	0.018267	104.19	0.37561	0.11951	31.818	37.79	2.0349	5.3848	0.00085786	1.6947e-05	1.9755	0.94353	0.011516	1.2205
GdC_95pls_5nm_LSC82_50nm_CaOCO3_restoration_20nm_CaO_105pls_0.673nm_1mbar_2_channel1.dat	1	2.7753e-06	0.00013876	6.4249e-06	1.3955e-08	0.2172	47.34	0.15915	0.33619	3.27	1.137	34.771	0.016681	0.013368	80.139	0.33659	0.077995	23.172	10.69	0.6264	5.8597	0.00066152	3.5136e-05	5.3114	0.9635	0.019614	2.0357	0			0			1
GdC_95pls_5nm_LSC82_50nm_CaOCO3_restoration_20nm_CaO_105pls_0.673nm_10mbar_2_channel1.dat	10	5.2998e-06	0.00026499	6.4119e-06	2.0109e-08	0.31362	51.99	0.16762	0.32241	4.636	1.2708	27.412	0.005853	0.0043296	73.972	0.39976	0.070551	17.648	8.782	0.85073	9.6872	0.00047974	4.722e-05	9.8428	0.98388	0.033214	3.3758	0			0			1
GdC_95pls_5nm_LSC82_50nm_CaOCO3_restoration_20nm_CaO_105pls_0.673nm_100mbar_2_channel1.dat	100	3.149e-06	0.00014486	6.3812e-06	1.468e-08	0.23005	53.5	0.070327	0.13145	4.152	1.1907	28.678	0.0027034	0.0015058	55.7	0.50542	0.051261	10.142	4.965	0.97679	19.674	0.00030899	5.6456e-05	18.271	0.99392	0.057472	5.7824	0			0			1
	T (K)	Chi-Sqr	Sum-Sqr	L1(+)	L1(Error)	L1(Error%)	YSZ(+)	YSZ(Error)	YSZ(Error%)	R1(X)	R1(Error)	R1(Error%)	CPE1-T(X)	CPE1-T(Error)	CPE1-T(Error%)	CPE1-P(X)	CPE1-P(Error)	CPE1-P(Error%)	R2(+)	R2(Error)	R2(Error%)	CPE2-T(+)	CPE2-T(Error)	CPE2-T(Error%)	CPE2-P(+)	CPE2-P(Error)	CPE2-P(Error%)
GdC_95pls_5nm_LSC82_50nm_CaOCO3_restoration_20nm_CaO_105pls_0.673nm_T1_2_channel1.dat	880.574	1.9651e-05	0.0012184	6.3845e-06	3.1862e-08	0.49905	48.4	0.061499	0.12706	33.08	2.4734	7.477	0.016893	0.0070801	41.911	0.53183	0.04941	9.2906	48.55	4.5485	9.3687	0.0010953	2.4561e-05	2.2424	0.98702	0.02164	2.1925
GdC_95pls_5nm_LSC82_50nm_CaOCO3_restoration_20nm_CaO_105pls_0.673nm_T2_2_channel1.dat	829.536	3.0835e-06	0.00019734	6.271e-06	2.8249e-08	0.45047	96.72	0.70296	0.7268	10.76	2.8323	26.322	0.015169	0.0069686	45.94	0.23348	0.056759	24.31	188.6	1.1024	0.58452	0.00068098	2.5508e-06	0.37458	0.94144	0.0025785	0.27389
GdC_95pls_5nm_LSC82_50nm_CaOCO3_restoration_20nm_CaO_105pls_0.673nm_T3_2_channel1.dat	813.45	4.2491e-06	0.00027194	6.0663e-06	3.9673e-08	0.65399	125.5	0.63345	0.50474	14.13	2.8501	20.171	0.0094893	0.0038893	40.986	0.26775	0.049487	18.483	275.1	1.4971	0.5442	0.00061102	2.4037e-06	0.39339	0.94569	0.0026138	0.27639
GdC_95pls_5nm_LSC82_50nm_CaOCO3_restoration_20nm_CaO_105pls_0.673nm_T4_2_channel1.dat	780.771	1.1941e-05	0.00081197	4.9981e-06	1.1155e-07	2.2318	227	2.0442	0.90053	39.32	25.587	65.074	0.011699	0.0075849	64.834	0.21076	0.077641	36.839	603.2	7.5017	1.2437	0.00050391	2.8914e-06	0.57379	0.95682	0.0048664	0.5086

## Sheet: LSC82-SnO2
	deposited thickness (nm)	Chi-Sqr	Sum-Sqr	L1(+)	L1(Error)	L1(Error%)	YSZ(+)	YSZ(Error)	YSZ(Error%)	R1(+)	R1(Error)	R1(Error%)	CPE1-T(+)	CPE1-T(Error)	CPE1-T(Error%)	CPE1-P(+)	CPE1-P(Error)	CPE1-P(Error%)	R2(+)	R2(Error)	R2(Error%)	CPE2-T(+)	CPE2-T(Error)	CPE2-T(Error%)	CPE2-P(+)	CPE2-P(Error)	CPE2-P(Error%)	R3(+)	R3(Error)	R3(Error%)	CPE3-T(+)	CPE3-T(Error)	CPE3-T(Error%)	CPE3-P(+)	CPE3-P(Error)	CPE3-P(Error%)
SnO2 deposition\GdC_95pls_5nm_LSC82_50nm_CaOCO3_res_20nm_CaO_0.673nm_res_720pls_20nm_2_channel1.dat	0	8.0261e-07	5.0564e-05	5.892e-06	7.8728e-09	0.13362	49.91	0.12693	0.25432	4.299	0.84253	19.598	0.029908	0.01109	37.08	0.27585	0.040068	14.525	25.42	0.35527	1.3976	0.0011092	1.2575e-05	1.1337	0.96089	0.004887	0.50859	11.61	0.30687	2.6432	0.030904	0.00078791	2.5495	0.97965	0.011217	1.145
SnO2 deposition\GdC_95pls_5nm_LSC82_50nm_CaOCO3_res_20nm_CaO_0.673nm_res_720pls_20nm_SnO2_1pls_0.11nm_2_channel1.dat	0.111111	8.9295e-07	5.447e-05	5.8912e-06	8.4524e-09	0.14348	50.32	0.13747	0.27319	3.904	0.64158	16.434	0.026571	0.0094234	35.465	0.28007	0.040058	14.303	64.19	0.93562	1.4576	0.0011933	6.693e-06	0.56088	0.93995	0.0034576	0.36785	7.543	0.81812	10.846	0.052632	0.0076354	14.507	1.029	0.034874	3.3891
SnO2 deposition\GdC_95pls_5nm_LSC82_50nm_CaOCO3_res_20nm_CaO_0.673nm_res_720pls_20nm_SnO2_2pls_0.22nm_2_channel1.dat	0.222222	1.5734e-06	9.7548e-05	5.8804e-06	1.0193e-08	0.17334	50	0.067108	0.13422	2.254	0.13968	6.197	0.0053887	0.0016984	31.518	0.44314	0.035147	7.9314	98.56	0.16388	0.16627	0.0012978	3.7237e-06	0.28692	0.91109	0.0012069	0.13247
SnO2 deposition\GdC_95pls_5nm_LSC82_50nm_CaOCO3_res_20nm_CaO_0.673nm_res_720pls_20nm_SnO2_3pls_0.33nm_2_channel1.dat	0.333333	6.3734e-06	0.00039515	5.8186e-06	2.2486e-08	0.38645	50.51	0.36681	0.72621	3.75	1.1104	29.611	0.024447	0.016695	68.291	0.27556	0.085177	30.911	152.8	0.72422	0.47397	0.0013018	5.5699e-06	0.42786	0.91599	0.0025196	0.27507
SnO2 deposition\GdC_95pls_5nm_LSC82_50nm_CaOCO3_res_20nm_CaO_0.673nm_res_720pls_20nm_SnO2_4pls_0.44nm_2_channel1.dat	0.444444	2.907e-05	0.0018605	5.8247e-06	4.9552e-08	0.85072	49.34	2.3555	4.774	7.322	19.451	265.65	0.074926	0.16811	224.37	0.16081	0.28718	178.58	264.8	3.8024	1.436	0.0013812	9.9492e-06	0.72033	0.90917	0.005523	0.60748
SnO2 deposition\GdC_95pls_5nm_LSC82_50nm_CaOCO3_res_20nm_CaO_0.673nm_res_720pls_20nm_SnO2_5pls_0.56nm_2_channel1.dat	0.555556	6.8012e-05	0.0046248	5.8052e-06	6.8062e-08	1.1724	50.36	1.2966	2.5747	10.14	46.371	457.31	0.088704	0.2379	268.2	0.19733	0.30599	155.07	391.9	9.7881	2.4976	0.0014084	1.6805e-05	1.1932	0.90833	0.0085246	0.93849
	Active surface (cm²)	number of pulses	deposited thickness (nm)	R	Cchem	kq	Co (Cchem)	T (K)		PO2	T (K)	R	Cchem	R norm	kq	Co (Cchem)		1000/T	T(K)	T(°C)	C	R	kq	Co-Cv
	0.144	0	0	25.42	0.000959245	9.15045e-08	5.07562e+22	877.952		0.01	872.086	889.2	0.0018185	128.045	0.00129549	5.07624e+22		1.16687	856.991	583.991	0.00158423	420.7	5.39698e-09	5.07607e+22
	Co (dop)	1	0.111111	64.19	0.00101267	3.62083e-08	5.07566e+22	877.261		0.04	877.194	391.9	0.00132641	56.4336	0.000782788	5.07591e+22		1.22952	813.327	540.327	0.00122416	1134	1.9002e-09	5.07576e+22
	5.07396e+22	2	0.222222	98.56	0.00106183	2.35962e-08	5.07571e+22	877.8		0.1	878.309	271.6	0.00113165	39.1104	0.000635863	5.07576e+22		1.25508	796.765	523.765	0.0011578	1575	1.34028e-09	5.0757e+22
	Cv (dop)	3	0.333333	152.8	0.00112259	1.52053e-08	5.07575e+22	876.944		1	876.545	94.14	0.000780593	13.5562	0.000319519	5.07546e+22		1.30078	768.772	495.772	0.00098741	2985	6.82339e-10	5.07554e+22
	8.59993e+20	4	0.444444	264.8	0.00124915	8.79391e-09	5.07586e+22	878.927		10	870.91	61.62	0.000657788	8.87328	0.000248189	5.07533e+22
		5	0.555556	391.9	0.00132641	5.93017e-09	5.07591e+22	877.194		100	868.876	39.95	0.000545499	5.7528	0.000194031	5.07521e+22
	pO2 (mbar)	Chi-Sqr	Sum-Sqr	L1(+)	L1(Error)	L1(Error%)	YSZ(+)	YSZ(Error)	YSZ(Error%)	R1(+)	R1(Error)	R1(Error%)	CPE1-T(+)	CPE1-T(Error)	CPE1-T(Error%)	CPE1-P(+)	CPE1-P(Error)	CPE1-P(Error%)	R2(+)	R2(Error)	R2(Error%)	CPE2-T(+)	CPE2-T(Error)	CPE2-T(Error%)	CPE2-P(+)	CPE2-P(Error)	CPE2-P(Error%)	R3(X)	CPE3-T(X)	CPE3-P(X)
SnO2 deposition\GdC_95pls_5nm_LSC82_50nm_CaOCO3_res_20nm_CaO_0.673nm_res_720pls_20nm_SnO2_5pls_0.56nm_0.01mba_2r_channel1.dat	0.01	4.7946e-05	0.0033562	5.7535e-06	5.2252e-08	0.90818	53.56	0.085556	0.15974	77.48	31.738	40.963	0.0060762	0.00060818	10.009	0.7138	0.01468	2.0566	889.2	34.344	3.8623	0.001822	9.5627e-05	5.2485	1.004	0.012092	1.2044	0	0	1
SnO2 deposition\GdC_95pls_5nm_LSC82_50nm_CaOCO3_res_20nm_CaO_0.673nm_res_720pls_20nm_SnO2_5pls_0.56nm_2_channel1.dat	0.04	6.8012e-05	0.0046248	5.8052e-06	6.8062e-08	1.1724	50.36	1.2966	2.5747	10.14	46.371	457.31	0.088704	0.2379	268.2	0.19733	0.30599	155.07	391.9	9.7881	2.4976	0.0014084	1.6805e-05	1.1932	0.90833	0.0085246	0.93849	0	0	1
SnO2 deposition\GdC_95pls_5nm_LSC82_50nm_CaOCO3_res_20nm_CaO_0.673nm_res_720pls_20nm_SnO2_5pls_0.56nm_0.1mbar_2_channel1.dat	0.1	3.9052e-05	0.0026556	5.8452e-06	5.7487e-08	0.98349	49.7	1.4087	2.8344	4.956	3.933	79.358	0.026279	0.037769	143.72	0.23507	0.19462	82.792	271.6	2.1101	0.77691	0.001276	8.8841e-06	0.69625	0.89824	0.0043675	0.48623	0	0	1
SnO2 deposition\GdC_95pls_5nm_LSC82_50nm_CaOCO3_res_20nm_CaO_0.673nm_res_720pls_20nm_SnO2_5pls_0.56nm_1mbar_3_channel1.dat	1	2.5881e-06	0.00016046	5.8118e-06	1.3151e-08	0.22628	50.75	0.09487	0.18694	3.271	0.29224	8.9343	0.0080555	0.0028369	35.217	0.39975	0.039483	9.8769	94.14	0.26518	0.28169	0.00096245	3.9467e-06	0.41007	0.91978	0.0018131	0.19712	0	0	1
SnO2 deposition\GdC_95pls_5nm_LSC82_50nm_CaOCO3_res_20nm_CaO_0.673nm_res_720pls_20nm_SnO2_5pls_0.56nm_10mbar_2_channel1.dat	10	1.2772e-06	7.6633e-05	5.7692e-06	9.5131e-09	0.16489	54.34	0.065644	0.1208	5.048	0.44666	8.8483	0.010429	0.0025091	24.059	0.38214	0.026304	6.8833	61.62	0.32913	0.53413	0.00074946	3.2726e-06	0.43666	0.9593	0.0023483	0.24479	0	0	1
SnO2 deposition\GdC_95pls_5nm_LSC82_50nm_CaOCO3_res_20nm_CaO_0.673nm_res_720pls_20nm_SnO2_5pls_0.56nm_100mbar_3_channel1.dat	100	3.4438e-06	0.00019285	5.7653e-06	1.5416e-08	0.26739	55.73	0.080451	0.14436	7.217	0.89342	12.379	0.005673	0.0017242	30.393	0.43422	0.032491	7.4826	39.95	0.69178	1.7316	0.00056567	6.8008e-06	1.2023	0.99051	0.0065205	0.6583	0	0	1
	T (K)	Chi-Sqr	Sum-Sqr	L1(+)	L1(Error)	L1(Error%)	YSZ(+)	YSZ(Error)	YSZ(Error%)	R1(+)	R1(Error)	R1(Error%)	CPE1-T(+)	CPE1-T(Error)	CPE1-T(Error%)	CPE1-P(+)	CPE1-P(Error)	CPE1-P(Error%)	R2(+)	R2(Error)	R2(Error%)	CPE2-T(+)	CPE2-T(Error)	CPE2-T(Error%)	CPE2-P(+)	CPE2-P(Error)	CPE2-P(Error%)	R3(X)	CPE3-T(X)	CPE3-P(X)	CPE3-T(+)	CPE3-T(Error)	CPE3-T(Error%)	CPE3-P(+)	CPE3-P(Error)	CPE3-P(Error%)
SnO2 deposition\GdC_95pls_5nm_LSC82_50nm_CaOCO3_res_20nm_CaO_0.673nm_res_720pls_20nm_SnO2_5pls_0.56nm_T1_2_channel1.dat	881.887	3.3103e-06	0.00022179	5.8061e-06	1.7135e-08	0.29512	47.67	1.1507	2.4139	31.41	2.7702	8.8195	0.0037308	9.2084e-05	2.4682	0.89863	0.016584	1.8455	420.7	2.7312	0.6492	0.001594	1.4667e-05	0.92014	0.98484	0.0027822	0.2825	6.366	9.3579	147	0.082627	0.10313	124.81	0.15359	0.14988	97.584
SnO2 deposition\GdC_95pls_5nm_LSC82_50nm_CaOCO3_res_20nm_CaO_0.673nm_res_720pls_20nm_SnO2_5pls_0.56nm_T2_2_channel1.dat	826.272	4.0513e-06	0.00027144	5.6545e-06	3.6104e-08	0.6385	101.8	2.0715	2.0349	23.57	14.3	60.67	0.019129	0.010979	57.395	0.16374	0.071715	43.798	1134	12.93	1.1402	0.0012225	2.2935e-05	1.8761	0.99586	0.0041143	0.41314	140.4	12.859	9.1588	0.0019938	5.4025e-05	2.7096	0.90491	0.012164	1.3442
SnO2 deposition\GdC_95pls_5nm_LSC82_50nm_CaOCO3_res_20nm_CaO_0.673nm_res_720pls_20nm_SnO2_5pls_0.56nm_T3_3_channel1.dat	806.559	3.8798e-06	0.00025607	5.3357e-06	3.8841e-08	0.72795	141.2	0.32329	0.22896	13.71	1.7513	12.774	0.0056448	0.0018628	33	0.34228	0.038269	11.181	1575	7.1326	0.45286	0.0011578	1.0272e-05	0.8872	1	0	0	226.3	8.9964	3.9754	0.0016798	1.2929e-05	0.76967	0.8931	0.0076534	0.85695
SnO2 deposition\GdC_95pls_5nm_LSC82_50nm_CaOCO3_res_20nm_CaO_0.673nm_res_720pls_20nm_SnO2_5pls_0.56nm_T4_2_channel1.dat	774.662	4.8584e-06	0.00026721	3.35e-06	1.7903e-07	5.3442	256	0.27135	0.106	2985	39.114	1.3104	0.00097419	2.3744e-05	2.4373	0.98753	0.0044947	0.45515	385.3	35.364	9.1783	0.0014539	4.6043e-05	3.1669	0.89674	0.010113	1.1278	18.55	1.5811	8.5235	0.0013252	0.00043261	32.645	0.55046	0.043638	7.9276
																								Cv (dop)

## Sheet: LSC82-SrO
	deposited thickness (nm)	Chi-Sqr	Sum-Sqr	L1(+)	L1(Error)	L1(Error%)	YSZ(+)	YSZ(Error)	YSZ(Error%)	R1(+)	R1(Error)	R1(Error%)	CPE1-T(+)	CPE1-T(Error)	CPE1-T(Error%)	CPE1-P(+)	CPE1-P(Error)	CPE1-P(Error%)	R2(+)	R2(Error)	R2(Error%)	CPE2-T(+)	CPE2-T(Error)	CPE2-T(Error%)	CPE2-P(+)	CPE2-P(Error)	CPE2-P(Error%)	R3(+)	R3(Error)	R3(Error%)	CPE3-T(+)	CPE3-T(Error)	CPE3-T(Error%)	CPE3-P(+)	CPE3-P(Error)	CPE3-P(Error%)
GdC_95pls_5nm_LSC82_50nm_CaOCO3_res_20nm_CaO_0,673nm_res_720pls_20nm_SnO2_5pls_0,56nm_LSC82_1440pls_40nm_4_channel1.dat	0	8.7313e-07	5.3261e-05	5.8084e-06	8.2672e-09	0.14233	50.82	0.1419	0.27922	11.7	0.40986	3.5031	0.031498	0.0011032	3.5024	0.99668	0.01422	1.4267	5.486	1.1424	20.824	0.031724	0.010804	34.056	0.26067	0.037047	14.212	25.69	0.47063	1.832	0.0015048	1.7776e-05	1.1813	0.95847	0.0059092	0.61652
GdC_95pls_5nm_LSC82_50nm_CaOCO3_res_20nm_CaO_0,673nm_res_720pls_20nm_SnO2_5pls_0,56nm_LSC82_1440pls_40nm_SrO_3pls_2_channel1.dat	0.130435	9.3373e-07	5.6958e-05	5.7987e-06	8.7404e-09	0.15073	51.75	0.15267	0.29501	12.34	0.45417	3.6805	0.028314	0.00072091	2.5461	0.97087	0.01252	1.2896	5.125	1.3549	26.437	0.031703	0.013709	43.242	0.26628	0.045494	17.085	15.38	0.41062	2.6698	0.0014193	2.8426e-05	2.0028	0.96041	0.0086401	0.89963
GdC_95pls_5nm_LSC82_50nm_CaOCO3_res_20nm_CaO_0,673nm_res_720pls_20nm_SnO2_5pls_0,56nm_LSC82_1440pls_40nm_SrO_6pls_0,24nm_2_channel1.dat	0.26087	9.0846e-07	5.5416e-05	5.8019e-06	8.6e-09	0.14823	51.05	0.15951	0.31246	12.02	0.43805	3.6443	0.029096	0.000747	2.5674	0.97655	0.01259	1.2892	5.016	1.3527	26.968	0.032917	0.014463	43.938	0.26136	0.046306	17.717	15.59	0.41705	2.6751	0.0015624	3.1165e-05	1.9947	0.94345	0.0085976	0.91129
GdC_95pls_5nm_LSC82_50nm_CaOCO3_res_20nm_CaO_0,673nm_res_720pls_20nm_SnO2_5pls_0,56nm_LSC82_1440pls_40nm_SrO_9pls_0,36nm_2_channel1.dat	0.391304	7.7177e-07	4.7078e-05	5.804e-06	7.9065e-09	0.13623	51.77	0.13945	0.26936	11.62	0.41792	3.5966	0.030455	0.00088047	2.8911	0.98076	0.013144	1.3402	5.206	1.2479	23.97	0.034014	0.012862	37.814	0.26057	0.040185	15.422	19.37	0.42451	2.1916	0.0016283	2.5177e-05	1.5462	0.93904	0.0070508	0.75085
GdC_95pls_5nm_LSC82_50nm_CaOCO3_res_20nm_CaO_0,673nm_res_720pls_20nm_SnO2_5pls_0,56nm_LSC82_1440pls_40nm_SrO_12pls_0,48nm_2_channel1.dat	0.521739	1.8678e-06	0.00011394	5.8271e-06	1.2324e-08	0.21149	50.26	0.70218	1.3971	10.05	0.88899	8.8457	0.034845	0.0022302	6.4003	1.019	0.031819	3.1226	9.863	8.1736	82.871	0.082355	0.043385	52.68	0.13816	0.063997	46.321	23.59	0.48028	2.0359	0.0017368	3.5201e-05	2.0268	0.92674	0.0071608	0.77269
GdC_95pls_5nm_LSC82_50nm_CaOCO3_res_20nm_CaO_0,673nm_res_720pls_20nm_SnO2_5pls_0,56nm_LSC82_1440pls_40nm_SrO_15pls_0,60nm_2_channel1.dat	0.652174	1.8893e-06	0.00011525	5.8261e-06	1.2312e-08	0.21132	50.56	0.96026	1.8992	8.79	0.95508	10.866	0.039453	0.0034505	8.7458	1.045	0.039579	3.7875	19.82	34.033	171.71	0.10829	0.053846	49.724	0.10695	0.060697	56.753	29	0.57932	1.9977	0.0017483	2.9847e-05	1.7072	0.92719	0.0063408	0.68387
GdC_95pls_5nm_LSC82_50nm_CaOCO3_res_20nm_CaO_0,673nm_res_720pls_20nm_SnO2_5pls_0,56nm_LSC82_1440pls_40nm_SrO_18pls_0,72nm_2_channel1.dat	0.782609	7.5823e-07	4.6252e-05	5.8074e-06	7.7164e-09	0.13287	50.93	0.14065	0.27616	10.01	0.49352	4.9303	0.036782	0.0020916	5.6865	1.002	0.018266	1.823	5.319	1.2168	22.876	0.037586	0.013035	34.68	0.25126	0.037752	15.025	31.1	0.58609	1.8845	0.0017443	1.7134e-05	0.98229	0.93131	0.0054823	0.58867
GdC_95pls_5nm_LSC82_50nm_CaOCO3_res_20nm_CaO_0,673nm_res_720pls_20nm_SnO2_5pls_0,56nm_LSC82_1440pls_40nm_SrO_21pls_0,84nm_2_channel1.dat	0.913043	2.5018e-06	0.00015761	5.8164e-06	1.4015e-08	0.24096	50.81	0.20896	0.41126	9.399	0.77062	8.199	0.042015	0.004715	11.222	1.032	0.029192	2.8287	4.778	1.1031	23.087	0.021362	0.010583	49.541	0.28779	0.0548	19.042	36.75	1.0443	2.8416	0.0017619	2.8142e-05	1.5973	0.92104	0.0085625	0.92966
Active surface (cm²)		number of pulses	deposited thickness (nm)	eq monolayers	R	Cchem	ASR	kq	T (K)	Co (Cchem)		PO2	T (K)	R	Cchem	ASR	kq	Co (Cchem)				1000/T	T(K)	T(°C)	C	R	ASR	kq	Co (Cchem)
0.144		0	0	0	25.69	0.00130697	3.69936	9.03858e-08	876.43	5.0759e+22		0.01	872.9	90.03	0.0017363	12.9643	2.56876e-08	5.07619e+22				1.15669	864.535	591.535	0.00141034	28.23	4.06512	8.1105e-08	5.07596e+22
Co		3	0.130435	0.477783	15.38	0.00121229	2.21472	1.50715e-07	874.917	5.07582e+22		0.04	876.446	36.75	0.00139338	5.292	6.31852e-08	5.07596e+22				1.20373	830.752	557.752	0.00110263	86.15	12.4056	2.55383e-08	5.07569e+22
5.07396e+22		6	0.26087	0.955566	15.59	0.00125051	2.24496	1.48878e-07	876.052	5.07585e+22		0.1	876.977	31	0.00126656	4.464	7.49503e-08	5.07587e+22				1.27008	787.35	514.35	0.000883159	379.5	54.648	5.49455e-09	5.07547e+22
Cv (dop)		9	0.391304	1.43335	19.37	0.00130102	2.78928	1.19665e-07	874.884	5.07589e+22		1	875.077	8.338	0.00228116	1.20067	2.78056e-07	5.07652e+22				1.29692	771.057	498.057	0.000847323	704.3	101.419	2.89938e-09	5.07542e+22
8.59993e+20		12	0.521739	1.91113	23.59	0.00134916	3.39696	9.85366e-08	877.362	5.07593e+22		10	877.986	5.27	0.000797572	0.75888	4.41392e-07	5.07547e+22
		15	0.652174	2.38892	29	0.00138332	4.176	8.01087e-08	876.86	5.07595e+22		100	886.436	3.184	0.000841664	0.458496	7.37601e-07	5.07552e+22
		18	0.782609	2.8667	31.1	0.00140693	4.4784	7.46473e-08	876.249	5.07597e+22
		21	0.913043	3.34448	36.75	0.00139338	5.292	6.31852e-08	876.446	5.07596e+22
	pO2 (mbar)	Chi-Sqr	Sum-Sqr	L1(+)	L1(Error)	L1(Error%)	YSZ(+)	YSZ(Error)	YSZ(Error%)	R1(+)	R1(Error)	R1(Error%)	CPE1-T(+)	CPE1-T(Error)	CPE1-T(Error%)	CPE1-P(+)	CPE1-P(Error)	CPE1-P(Error%)	R2(+)	R2(Error)	R2(Error%)	CPE2-T(+)	CPE2-T(Error)	CPE2-T(Error%)	CPE2-P(+)	CPE2-P(Error)	CPE2-P(Error%)	R3(+)	R3(Error)	R3(Error%)	CPE3-T(+)	CPE3-T(Error)	CPE3-T(Error%)	CPE3-P(+)	CPE3-P(Error)	CPE3-P(Error%)
GdC_95pls_5nm_LSC82_50nm_CaOCO3_res_20nm_CaO_0,673nm_res_720pls_20nm_SnO2_5pls_0,56nm_LSC82_1440pls_40nm_SrO_21pls_0,84nm_0,01mbar_2_channel1.dat	0.01	8.5655e-06	0.00055676	5.7947e-06	2.5653e-08	0.4427	53.03	0.24269	0.45765	31.68	2.1789	6.8778	0.04394	0.0046437	10.568	1.065	0.029104	2.7328	3.242	0.66996	20.665	0.010956	0.0078942	72.054	0.35944	0.083011	23.095	90.03	2.0636	2.2921	0.002096	2.2129e-05	1.0558	0.89855	0.0064204	0.71453
GdC_95pls_5nm_LSC82_50nm_CaOCO3_res_20nm_CaO_0,673nm_res_720pls_20nm_SnO2_5pls_0,56nm_LSC82_1440pls_40nm_SrO_21pls_0,84nm_2_channel1.dat	0.04	2.5018e-06	0.00015761	5.8164e-06	1.4015e-08	0.24096	50.81	0.20896	0.41126	9.399	0.77062	8.199	0.042015	0.004715	11.222	1.032	0.029192	2.8287	4.778	1.1031	23.087	0.021362	0.010583	49.541	0.28779	0.0548	19.042	36.75	1.0443	2.8416	0.0017619	2.8142e-05	1.5973	0.92104	0.0085625	0.92966
GdC_95pls_5nm_LSC82_50nm_CaOCO3_res_20nm_CaO_0,673nm_res_720pls_20nm_SnO2_5pls_0,56nm_LSC82_1440pls_40nm_SrO_21pls_0,84nm_0,1mbar_2_channel1.dat	0.1	2.1172e-06	0.00012492	5.8183e-06	1.2451e-08	0.214	50.49	0.25688	0.50877	0.99268	0.55023	55.429	0.13486	0.06303	46.737	1.279	0.17579	13.744	31	0.77295	2.4934	0.0016428	3.6045e-05	2.1941	0.91966	0.0083261	0.90535	5.451	1.7907	32.851	0.047157	0.020663	43.817	0.21793	0.049493	22.711
GdC_95pls_5nm_LSC82_50nm_CaOCO3_res_20nm_CaO_0,673nm_res_720pls_20nm_SnO2_5pls_0,56nm_LSC82_1440pls_40nm_SrO_21pls_0,84nm_1mbar_2_channel1.dat	1	8.2765e-07	4.3865e-05	5.7872e-06	7.4383e-09	0.12853	51.65	0.057576	0.11147	8.338	15.35	184.1	0.00182	0.0028809	158.29	1.057	0.14683	13.891	6.993	16.587	237.19	0.0018426	0.001774	96.277	0.93716	0.090664	9.6743	4.714	1.7409	36.93	0.011691	0.005432	46.463	0.38662	0.041698	10.785
GdC_95pls_5nm_LSC82_50nm_CaOCO3_res_20nm_CaO_0,673nm_res_720pls_20nm_SnO2_5pls_0,56nm_LSC82_1440pls_40nm_SrO_21pls_0,84nm_10mbar_2_channel1.dat	10	3.2829e-06	0.00018056	5.9727e-06	3.8039e-07	6.3688	49.89	29.076	58.28	4.311	29.268	678.91	3.9196e-07	5.5587e-06	1418.2	0.77425	0.25107	32.428	5.27	1.2666	24.034	0.0043962	0.0026567	60.432	0.48676	0.078202	16.066	17.07	0.89669	5.253	0.00094052	2.278e-05	2.4221	0.96163	0.016561	1.7222
GdC_95pls_5nm_LSC82_50nm_CaOCO3_res_20nm_CaO_0,673nm_res_720pls_20nm_SnO2_5pls_0,56nm_LSC82_1440pls_40nm_SrO_21pls_0,84nm_100mbar_2_channel1.dat	100	6.7834e-07	3.3239e-05	5.9754e-06	2.3382e-07	3.913	45.27	8.8978	19.655	3.936	0.55671	14.144	0.0071157	0.0023208	32.615	0.47601	0.036806	7.7322	3.184	8.9299	280.46	8.9294e-09	2.2942e-08	256.93	1.045	0.1364	13.053	13.33	0.41919	3.1447	0.0009283	1.3467e-05	1.4507	0.97818	0.0093917	0.96012
	T (K)	Chi-Sqr	Sum-Sqr	L1(+)	L1(Error)	L1(Error%)	YSZ(+)	YSZ(Error)	YSZ(Error%)	R1(+)	R1(Error)	R1(Error%)	CPE1-T(+)	CPE1-T(Error)	CPE1-T(Error%)	CPE1-P(+)	CPE1-P(Error)	CPE1-P(Error%)	R2(+)	R2(Error)	R2(Error%)	CPE2-T(+)	CPE2-T(Error)	CPE2-T(Error%)	CPE2-P(+)	CPE2-P(Error)	CPE2-P(Error%)	R3(X)	CPE3-T(X)	CPE3-P(X)	CPE3-T(+)	CPE3-T(Error)	CPE3-T(Error%)	CPE3-P(+)	CPE3-P(Error)	CPE3-P(Error%)
GdC_95pls_5nm_LSC82_50nm_CaOCO3_res_20nm_CaO_0,673nm_res_720pls_20nm_SnO2_5pls_0,56nm_LSC82_1440pls_40nm_SrO_21pls_0,84nm_T1_2_channel1.dat	892.055	7.3757e-07	4.4992e-05	5.8353e-06	6.2482e-09	0.10708	42.56	0.052027	0.12224	2.652	0.29642	11.177	0.020286	0.0061618	30.375	0.35973	0.032885	9.1416	28.23	0.4417	1.5646	0.0016752	1.5317e-05	0.91434	0.94661	0.0047127	0.49785	12.35	0.37069	3.0015	0.031215	0.0012289	3.9369	0.97708	0.012339	1.2628
GdC_95pls_5nm_LSC82_50nm_CaOCO3_res_20nm_CaO_0,673nm_res_720pls_20nm_SnO2_5pls_0,56nm_LSC82_1440pls_40nm_SrO_21pls_0,84nm_T2_2_channel1.dat	847.804	5.4684e-06	0.00034998	5.7747e-06	2.8e-08	0.48487	73.76	0.503	0.68194	9.716	3.3951	34.943	0.017396	0.010377	59.652	0.25682	0.066738	25.986	86.15	4.8124	5.5861	0.0012682	1.5009e-05	1.1835	0.94057	0.011252	1.1963	10.68	3.3907	31.748	0.034244	0.016751	48.917	1
GdC_95pls_5nm_LSC82_50nm_CaOCO3_res_20nm_CaO_0,673nm_res_720pls_20nm_SnO2_5pls_0,56nm_LSC82_1440pls_40nm_SrO_21pls_0,84nm_T3_2_channel1.dat	795.648	4.9237e-06	0.00033481	5.0228e-06	5.0183e-08	0.9991	171.5	0.32273	0.18818	29.48	5.796	19.661	0.0081906	0.002145	26.189	0.32307	0.03212	9.9421	379.5	3.6333	0.95739	0.00092972	5.3912e-06	0.57987	0.953	0.0037098	0.38928	0	0	1	0.0022272	0.00035317	15.857	0.45392	0.015389	3.3902
GdC_95pls_5nm_LSC82_50nm_CaOCO3_res_20nm_CaO_0,673nm_res_720pls_20nm_SnO2_5pls_0,56nm_LSC82_1440pls_40nm_SrO_21pls_0,84nm_T4_4_channel1.dat	777.208	1.494e-05	0.0010159	4.1066e-06	1.2413e-07	3.0227	243.4	1.0933	0.44918	74.93	50.525	67.43	0.0099446	0.0041938	42.172	0.24991	0.050633	20.26	704.3	15.762	2.238	0.00087209	1.0904e-05	1.2503	0.94419	0.0071623	0.75857	0	0	1	4.8442e-05	0.00011884	245.32	0.76339	0.23112	30.275

## Sheet: LSC82-Decorations
	SrO	SnO2	CaO
	20	9	156	p/nm
	26	9	164	p/nm
	28	9	149	p/nm
	23	9	157	p/nm
	29
mean value	25.2	9	156.5	p/nm
standard deviation	3.5	0	6.13732

## Sheet: LSC91
Model: C:\DATA\Docs\Mes_Documents\PLD\Modelecircuit.mdl	deposited thickness	Chi-Sqr	Sum-Sqr	L1(+)	L1(Error)	L1(Error%)	YSZ(+)	YSZ(Error)	YSZ(Error%)	R1(+)	R1(Error)	R1(Error%)	CPE1-T(+)	CPE1-T(Error)	CPE1-T(Error%)	CPE1-P(+)	CPE1-P(Error)	CPE1-P(Error%)	R2(+)	R2(Error)	R2(Error%)	CPE2-T(+)	CPE2-T(Error)	CPE2-T(Error%)	CPE2-P(+)	CPE2-P(Error)	CPE2-P(Error%)	R3(X)	R3(Error)	R3(Error%)	CPE3-T(+)	CPE3-T(Error)	CPE3-T(Error%)	CPE3-P(+)	CPE3-P(Error)	CPE3-P(Error%)
Buffer_GdC_90pls_5nm_2Hz_channel1.dat	0	2.7848e-05	0.0016709	6.3542e-06	3.9301e-08	0.6185	51	0.079861	0.15659	323.3	137.21	42.44	4.9014e-05	1.0239e-05	20.89	1.028	0.067856	6.6008	583.5	139.62	23.928	4.1006e-05	5.9813e-06	14.586	0.77611	0.0089675	1.1554	0	0	0	0	0	0	1	0	0
Buffer_GdC_90pls_5nm_2Hz_LSC91_39pls_1nm_2_channel1.dat	1	2.1534e-06	0.00013351	6.4306e-06	1.1567e-08	0.17987	48.25	0.079402	0.16456	1131	3.4843	0.30807	1.7323e-05	6.4165e-08	0.3704	0.86425	0.001052	0.12172	38.6	5.3304	13.809	0.0078344	0.0011543	14.734	0.35451	0.015671	4.4205	0	0	0	0	0	0	1	0	0
Buffer_GdC_90pls_5nm_2Hz_LSC91_111pls_3nm_2_channel1.dat	3	1.5381e-05	0.00090747	6.4256e-06	3.1217e-08	0.48582	48.42	0.18881	0.38994	52.18	12.268	23.511	4.8468e-05	7.8535e-06	16.203	0.79844	0.026885	3.3672	48.73	3.2063	6.5797	0.0071157	0.0017241	24.23	0.37134	0.023304	6.2757	80.53	11.35	14.094	2.7664e-05	1.8538e-06	6.7011	1.009	0.028157	2.7906
Buffer_GdC_90pls_5nm_2Hz_LSC91_195pls_5nm_2_channel1.dat	5	6.2321e-06	0.00038016	6.4048e-06	1.8333e-08	0.28624	48.04	0.058513	0.1218	58.06	1.7885	3.0804	5.3333e-05	1.4868e-06	2.7878	0.97602	0.009681	0.99189	19.31	1.7527	9.0766	0.00023483	3.5545e-05	15.136	0.65573	0.015745	2.4011	13.24	0.51078	3.8579	0.017928	0.0008303	4.6313	0.89938	0.02999	3.3345
Buffer_GdC_90pls_5nm_2Hz_LSC91_390pls_10nm_2_channel1.dat	10	1.5959e-06	9.4161e-05	6.4143e-06	9.4326e-09	0.14706	47.39	0.036793	0.077639	47.78	0.428	0.89577	9.563e-05	1.3157e-06	1.3758	0.96259	0.0038015	0.39492	5.777	0.38536	6.6706	0.00086696	0.00018497	21.335	0.59092	0.021157	3.5803	9.923	0.24899	2.5092	0.023577	0.0006137	2.603	0.9247	0.018251	1.9737
Buffer_GdC_90pls_5nm_2Hz_LSC91_585pls_15nm_2_channel1.dat	15	1.1752e-06	6.9338e-05	6.4148e-06	8.1502e-09	0.12705	47.64	0.032767	0.06878	46.45	0.33485	0.72088	0.00012685	1.4782e-06	1.1653	0.96091	0.0032153	0.33461	4.647	0.28354	6.1016	0.0012077	0.00025879	21.428	0.57548	0.02138	3.7152	9.328	0.22045	2.3633	0.02454	0.00058515	2.3845	0.9402	0.016637	1.7695
Buffer_GdC_90pls_5nm_2Hz_LSC91_780pls_20nm_3_channel1.dat	20	1.064e-06	6.2774e-05	6.4197e-06	7.7603e-09	0.12088	47.03	0.033467	0.071161	37.38	0.31944	0.85457	0.00015353	1.9421e-06	1.265	0.96297	0.0036208	0.376	4.264	0.29309	6.8736	0.0016396	0.00038346	23.387	0.55286	0.023213	4.1987	9.399	0.18855	2.0061	0.024415	0.00049485	2.0268	0.93785	0.014208	1.515
Buffer_GdC_90pls_5nm_2Hz_LSC91_1170pls_30nm_2_channel1.dat	30	1.6535e-06	0.00010086	6.4231e-06	9.7562e-09	0.15189	46.79	0.044475	0.095052	30.86	0.30824	0.99883	0.00020973	3.6485e-06	1.7396	0.95761	0.0046831	0.48904	3.516	0.26667	7.5845	0.0016047	0.00050794	31.653	0.55032	0.031323	5.6918	9.138	0.19502	2.1342	0.024986	0.00059933	2.3987	0.94424	0.015181	1.6077
Buffer_GdC_90pls_5nm_2Hz_LSC91_1560pls_40nm_4_channel1.dat	40	4.2985e-06	0.00026221	6.427e-06	1.6886e-08	0.26274	50.51	0.091665	0.18148	30.27	0.75232	2.4854	0.00024348	7.3522e-06	3.0196	0.96327	0.0096471	1.0015	4.94	0.79539	16.101	0.0028507	0.0014289	50.125	0.48623	0.04968	10.217	10.16	0.35506	3.4947	0.023376	0.00090022	3.851	0.94009	0.024255	2.5801
Buffer_GdC_90pls_5nm_2Hz_LSC91_1950pls_50nm_2_channel1.dat	50	1.0293e-06	6.2787e-05	6.4176e-06	8.2895e-09	0.12917	51.35	0.041852	0.081503	4.329	0.3669	8.4754	0.0023931	0.00065588	27.407	0.51253	0.027011	5.2701	9.44	0.14897	1.5781	0.023342	0.0004139	1.7732	0.93199	0.011133	1.1945	20.43	0.35033	1.7148	0.00029538	6.2225e-06	2.1066	0.95969	0.0065842	0.68608
Active surface (cm²)	number of pulses	deposited thickness (nm)	R	ASR	Cchem	kq	T (K)				PO2	T (K)	R	Cchem	ASR	kq	Co (Cchem)			1000/T	T(K)	T(°C)	Cchem	R	ASR	kq	Co (Cchem)
0.149176	0	0	323.3	48.2286	5.48718e-05	7.11946e-09	876.134				0.01	880.824	47.93	0.000283038	7.15	4.82796e-08	5.11786e+22			1.28721	776.876	503.876	0.000157153	253.8	37.8608	8.0416e-09	5.11759e+22
Co (dop)	39	1	1131	168.718	9.34021e-06	2.04605e-09	880.841				0.04	875.562	20.43	0.00023832	3.04766	1.1259e-07	5.11779e+22			1.23492	809.766	536.766	0.000187328	116.9	17.4387	1.81981e-08	5.11766e+22
5.11696e+22	117	3	52.18	7.784	1.07115e-05	4.43329e-08	880.539				0.1	880.379	12.58	0.000223168	1.87663	1.83853e-07	5.11776e+22			1.17299	852.519	579.519	0.000206793	52.34	7.80787	4.2791e-08	5.11772e+22
Cv (dop)	195	5	58.06	8.66115	4.62753e-05	3.98739e-08	881.218				1	877.935	2.951	0.000224364	0.440218	7.81583e-07	5.11776e+22			1.13864	878.241	605.241	0.000230323	32.39	4.83181	7.12336e-08	5.11777e+22
4.29997e+20	390	10	47.78	7.12762	7.75615e-05	4.85178e-08	882.4				10	880.681	3.047	9.67645e-05	0.454539	7.59326e-07	5.11749e+22
	585	15	46.45	6.92922	0.00010294	4.98812e-08	881.942				100	878.258	3.081	8.73351e-05	0.459611	7.48881e-07	5.11746e+22
	780	20	37.38	5.57619	0.000125896	6.20634e-08	883.065
	1170	30	30.86	4.60357	0.000167789	7.52141e-08	883.513
	1560	40	30.27	4.51555	0.000201906	7.61099e-08	876.944
	1950	50	20.43	3.04766	0.00023832	1.1259e-07	875.562
Model: C:\DATA\Docs\Mes_Documents\PLD\Modelecircuit.mdl	pO2 (mbar)	Chi-Sqr	Sum-Sqr	L1(+)	L1(Error)	L1(Error%)	YSZ(+)	YSZ(Error)	YSZ(Error%)	R1(+)	R1(Error)	R1(Error%)	CPE1-T(+)	CPE1-T(Error)	CPE1-T(Error%)	CPE1-P(+)	CPE1-P(Error)	CPE1-P(Error%)	R2(+)	R2(Error)	R2(Error%)	CPE2-T(+)	CPE2-T(Error)	CPE2-T(Error%)	CPE2-P(+)	CPE2-P(Error)	CPE2-P(Error%)	R3(+)	R3(Error)	R3(Error%)	CPE3-T(+)	CPE3-T(Error)	CPE3-T(Error%)	CPE3-P(+)	CPE3-P(Error)	CPE3-P(Error%)
Buffer_GdC_90pls_5nm_2Hz_LSC91_1950pls_50nm_0,01mbar_2_channel1.dat	0.01	1.1134e-06	6.7918e-05	6.4258e-06	8.1518e-09	0.12686	48.26	0.039578	0.08201	4.12	0.24633	5.9789	0.0034653	0.00076082	21.955	0.48852	0.022775	4.662	28.83	0.30295	1.0508	0.023378	0.00020163	0.86248	0.9421	0.0069858	0.74151	47.93	0.28188	0.58811	0.00033178	2.7202e-06	0.81988	0.96305	0.0027374	0.28424
Buffer_GdC_90pls_5nm_2Hz_LSC91_1950pls_50nm_2_channel1.dat	0.04	1.0293e-06	6.2787e-05	6.4176e-06	8.2895e-09	0.12917	51.35	0.041852	0.081503	4.329	0.3669	8.4754	0.0023931	0.00065588	27.407	0.51253	0.027011	5.2701	9.44	0.14897	1.5781	0.023342	0.0004139	1.7732	0.93199	0.011133	1.1945	20.43	0.35033	1.7148	0.00029538	6.2225e-06	2.1066	0.95969	0.0065842	0.68608
Buffer_GdC_90pls_5nm_2Hz_LSC91_1950pls_50nm_0,1mbar_2_channel1.dat	0.1	2.876e-06	0.00015818	6.4384e-06	1.4301e-08	0.22212	48.51	0.11026	0.22729	5.025	1.7187	34.203	0.0049943	0.0036461	73.005	0.43605	0.067935	15.58	4.153	0.49426	11.901	0.023567	0.0020921	8.8772	0.95521	0.044947	4.7055	12.58	1.1177	8.8847	0.00026489	1.71e-05	6.4555	0.97083	0.023841	2.4557
Buffer_GdC_90pls_5nm_2Hz_LSC91_1950pls_50nm_1mbar_2_channel1.dat	1	1.1877e-06	5.8195e-05	6.401e-06	8.4553e-09	0.13209	49.92	0.034557	0.069225	2.951	1.2927	43.805	0.00024482	5.651e-05	23.082	0.98808	0.085285	8.6314	0.17283	0.30497	176.46	0.022567	0.022422	99.357	1.249	0.56192	44.99	4.481	1.662	37.09	0.0017331	0.00059829	34.521	0.56476	0.032501	5.7548
Buffer_GdC_90pls_5nm_2Hz_LSC91_1950pls_50nm_10mbar_3_channel1.dat	10	1.6381e-06	6.7164e-05	6.5518e-06	2.13e-07	3.251	48.34	35.072	72.553	1.994	2.8395	142.4	0.00035359	0.0010257	290.08	0.72308	0.35247	48.746	4.396	1.8871	42.928	0.00025771	3.7734e-05	14.642	0.87381	0.068374	7.8248	3.047	36.042	1182.9	1.7838e-05	0.00017751	995.12	0.55956	1.2664	226.32
Buffer_GdC_90pls_5nm_2Hz_LSC91_1950pls_50nm_100mbar_2_channel1.dat	100	1.747e-06	6.4641e-05	6.4732e-06	1.1909e-08	0.18397	49.73	0.098984	0.19904	0.19501	2.3	1179.4	2.932e-06	5.8491e-05	1994.9	2.993	3.8758	129.5	3.081	1.5259	49.526	0.00020558	8.3221e-05	40.481	0.89586	0.11093	12.383	2.247	1.8192	80.961	0.0021448	0.0031196	145.45	0.50982	0.12104	23.742
Model: C:\DATA\Docs\Mes_Documents\PLD\Modelecircuit.mdl	T (K)	Chi-Sqr	Sum-Sqr	L1(+)	L1(Error)	L1(Error%)	YSZ(+)	YSZ(Error)	YSZ(Error%)	R1(+)	R1(Error)	R1(Error%)	CPE1-T(+)	CPE1-T(Error)	CPE1-T(Error%)	CPE1-P(+)	CPE1-P(Error)	CPE1-P(Error%)	R2(+)	R2(Error)	R2(Error%)	CPE2-T(+)	CPE2-T(Error)	CPE2-T(Error%)	CPE2-P(+)	CPE2-P(Error)	CPE2-P(Error%)	R3(+)	R3(Error)	R3(Error%)	CPE3-T(+)	CPE3-T(Error)	CPE3-T(Error%)	CPE3-P(+)	CPE3-P(Error)	CPE3-P(Error%)
Buffer_GdC_90pls_5nm_2Hz_LSC91_1950pls_50nm_T4_3_channel1.dat	776.876	1.307e-05	0.00083648	4.7831e-06	1.132e-07	2.3667	245	0.51561	0.21045	0	0	0	0	0	0	1	0	0	57.36	10.459	18.234	0.0026525	0.0004965	18.718	0.36345	0.022055	6.0682	253.8	7.1598	2.821	0.00017863	2.8413e-06	1.5906	0.96024	0.010274	1.0699
Buffer_GdC_90pls_5nm_2Hz_LSC91_1950pls_50nm_T3_3_channel1.dat	809.766	8.8493e-06	0.00054866	6.0937e-06	5.3848e-08	0.88367	133.6	0.38465	0.28791	0	0	0	0	0	0	1	0	0	57.51	3.8121	6.6286	0.0075809	0.00079699	10.513	0.28417	0.016703	5.8778	116.9	2.1199	1.8134	0.00021214	4.1302e-06	1.9469	0.96745	0.0077702	0.80316
Buffer_GdC_90pls_5nm_2Hz_LSC91_1950pls_50nm_T2_2_channel1.dat	852.519	2.3249e-06	0.00013717	6.4388e-06	1.6261e-08	0.25255	69.07	0.11987	0.17355	9.296	1.3386	14.4	0.0043098	0.0014537	33.73	0.40627	0.033768	8.3117	11.63	0.56357	4.8458	0.019874	0.00091431	4.6005	0.97247	0.028153	2.895	52.34	1.0717	2.0476	0.00024309	4.4484e-06	1.8299	0.96427	0.0070474	0.73085
Buffer_GdC_90pls_5nm_2Hz_LSC91_1950pls_50nm_T1_2_channel1.dat	878.241	2.9259e-06	0.00017848	6.473e-06	1.3725e-08	0.21203	49.74	0.07162	0.14399	4.632	0.54822	11.835	0.0028205	0.0011131	39.465	0.4913	0.03954	8.048	11.87	0.3117	2.6259	0.021247	0.00060941	2.8682	0.95543	0.017813	1.8644	32.39	0.56829	1.7545	0.00028527	6.5348e-06	2.2907	0.95632	0.0072393	0.757

## Sheet: LSC91-CaO
Model: C:\DATA\Docs\Mes_Documents\PLD\Modelecircuit.mdl	deposited thickness	Chi-Sqr	Sum-Sqr	L1(+)	L1(Error)	L1(Error%)	YSZ(+)	YSZ(Error)	YSZ(Error%)	R1(+)	R1(Error)	R1(Error%)	CPE1-T(+)	CPE1-T(Error)	CPE1-T(Error%)	CPE1-P(+)	CPE1-P(Error)	CPE1-P(Error%)	R2(+)	R2(Error)	R2(Error%)	CPE2-T(+)	CPE2-T(Error)	CPE2-T(Error%)	CPE2-P(+)	CPE2-P(Error)	CPE2-P(Error%)	R3(+)	R3(Error)	R3(Error%)	CPE3-T(+)	CPE3-T(Error)	CPE3-T(Error%)	CPE3-P(+)	CPE3-P(Error)	CPE3-P(Error%)
Buffer_GdC_90pls_5nm_2Hz_LSC91_1950pls_50nm_CaO_0pls_0nm_2Hz_3_channel1.dat	0	2.8593e-06	0.00017442	6.4953e-06	1.393e-08	0.21446	49.75	0.089228	0.17935	5.042	0.70754	14.033	0.0046768	0.0019355	41.385	0.43781	0.041612	9.5046	11.13	0.35936	3.2288	0.022256	0.00078762	3.5389	0.97026	0.020876	2.1516	41.27	0.66207	1.6042	0.00027705	5.1114e-06	1.8449	0.96147	0.0062471	0.64974
Buffer_GdC_90pls_5nm_2Hz_LSC91_1950pls_50nm_CaO_23pls_0,13nm_2Hz_2_channel1.dat	0.589744	1.2264e-06	7.2355e-05	6.4889e-06	8.7727e-09	0.1352	49.41	0.044616	0.090298	4.825	0.3074	6.371	0.0033833	0.00073401	21.695	0.47769	0.022359	4.6807	10.05	0.37641	3.7454	0.025518	0.00094974	3.7218	0.99356	0.021637	2.1777	60.47	0.45333	0.74968	0.00027993	2.5851e-06	0.92348	0.96065	0.0030511	0.31761
Buffer_GdC_90pls_5nm_2Hz_LSC91_1950pls_50nm_CaO_46pls_0,26nm_2Hz_2_channel1.dat	1.17949	2.7501e-06	0.00016776	6.5005e-06	1.3712e-08	0.21094	50.11	0.091837	0.18327	5.517	0.74806	13.559	0.0061169	0.0022653	37.033	0.41312	0.037983	9.1942	9.845	0.52864	5.3696	0.025929	0.0016021	6.1788	1.001	0.030669	3.0638	66.64	0.81083	1.2167	0.00027827	3.533e-06	1.2696	0.96142	0.0046157	0.48009
Buffer_GdC_90pls_5nm_2Hz_LSC91_1950pls_50nm_CaO_69pls_0,40nm_2Hz_2_channel1.dat	1.76923	1.2733e-06	7.7669e-05	6.474e-06	8.9347e-09	0.13801	49.47	0.045031	0.091027	4.818	0.28879	5.994	0.0031708	0.00067469	21.278	0.48098	0.021986	4.5711	9.848	0.37357	3.7934	0.026547	0.0011469	4.3203	0.99377	0.021155	2.1288	66.11	0.46248	0.69956	0.00028281	2.4785e-06	0.87638	0.95698	0.0028694	0.29984
Buffer_GdC_90pls_5nm_2Hz_LSC91_1950pls_50nm_CaO_92pls_0,53nm_2Hz_2_channel1.dat	2.35897	1.277e-06	7.5343e-05	6.4711e-06	9.0062e-09	0.13918	50.18	0.044574	0.088828	4.891	0.28346	5.7955	0.0031483	0.00065092	20.675	0.48239	0.021479	4.4526	8.549	0.44631	5.2206	0.030489	0.0016067	5.2698	1.028	0.028588	2.7809	75.74	0.50045	0.66075	0.00028683	2.3211e-06	0.80922	0.95386	0.0026771	0.28066
Buffer_GdC_90pls_5nm_2Hz_LSC91_1950pls_50nm_CaO_115pls_0,66nm_2Hz_2_channel1.dat	2.94872	3.4489e-06	0.00020349	6.4873e-06	1.5201e-08	0.23432	49.24	0.10538	0.21401	5.33	0.82375	15.455	0.0070357	0.0029393	41.777	0.40282	0.043186	10.721	7.949	0.7842	9.8654	0.03318	0.0033896	10.216	1.035	0.053445	5.1638	83.09	1.0269	1.2359	0.00029063	3.5375e-06	1.2172	0.95558	0.0045519	0.47635
	Active surface (cm²)	number of pulses	deposited thickness (nm)	R	ASR	Cchem	kq	Co (Cchem)	T (K)			PO2	R	ASR	Cchem	R norm	kq	Co (Cchem)	T (K)		1000/T	T(K)	T(°C)	C	R	ASR	kq	Co (Cchem)
	0.1492	0	0	41.27	6.15748	0.000231602	5.59053e-08	5.11778e+22	878.224			0.01	199.9	29.8251	0.00030217	29.8251	1.14747e-08	5.11789e+22	873.117		1.29411	772.734	499.734	0.000161206	1025	152.93	1.98056e-09	5.1176e+22
	Co (dop)	23	0.589744	60.47	9.02212	0.000236859	3.818e-08	5.11778e+22	878.807			0.04	78.82	11.7599	0.000263878	11.7599	2.93092e-08	5.11783e+22	879.343		1.24949	800.324	527.324	0.000176812	451.4	67.3489	4.65786e-09	5.11764e+22
	5.11696e+22	46	1.17949	66.64	9.94269	0.000237122	3.4598e-08	5.11778e+22	877.614			0.1	54.94	8.19705	0.000238231	8.19705	4.20846e-08	5.11779e+22	880.096		1.21326	824.224	551.224	0.000197377	226.8	33.8386	9.54738e-09	5.11769e+22
	Cv (dop)	69	1.76923	66.11	9.86361	0.000236485	3.49186e-08	5.11778e+22	878.703			1	17.41	2.59757	0.000181426	2.59757	1.3296e-07	5.11768e+22	881.128		1.16551	857.996	584.996	0.000257367	79.04	11.7928	2.85181e-08	5.11781e+22
	4.29997e+20	92	2.35897	75.74	11.3004	0.000238331	3.0437e-08	5.11779e+22	877.496			10	12.91	1.92617	0.00017916	1.92617	1.78567e-07	5.11768e+22	877.496
		115	2.94872	83.09	12.397	0.000244438	2.77953e-08	5.1178e+22	879.1			100	7.055	1.05261	0.000164164	1.05261	3.26605e-07	5.11765e+22	877.077
Model: C:\DATA\Docs\Mes_Documents\i-PLD\Modelecircuit.mdl	pO2 (mbar)	Chi-Sqr	Sum-Sqr	L1(+)	L1(Error)	L1(Error%)	YSZ(+)	YSZ(Error)	YSZ(Error%)	R1(+)	R1(Error)	R1(Error%)	CPE1-T(+)	CPE1-T(Error)	CPE1-T(Error%)	CPE1-P(+)	CPE1-P(Error)	CPE1-P(Error%)	R2(+)	R2(Error)	R2(Error%)	CPE2-T(+)	CPE2-T(Error)	CPE2-T(Error%)	CPE2-P(+)	CPE2-P(Error)	CPE2-P(Error%)	R3(X)	CPE3-T(X)	CPE3-P(X)
Buffer_GdC_90pls_5nm_2Hz_LSC91_1950pls_50nm_CaO_115pls_0,66nm_2Hz_0,01mbar_2_channel1.dat	0.01	3.8891e-05	0.0025279	6.4536e-06	4.8139e-08	0.74592	52.89	0.11556	0.21849	213.1	0	0	0.022212	0.0016384	7.3762	0.3467	0.00938	2.7055	199.9	2.3026	1.1519	0.00032489	4.3797e-06	1.3481	0.97417	0.0051698	0.53069	0	0	1
Buffer_GdC_90pls_5nm_2Hz_LSC91_1950pls_50nm_CaO_115pls_0,66nm_2Hz_2_channel1.dat	0.04	1.5377e-05	0.0009534	6.4903e-06	3.0355e-08	0.4677	49.1	0.21283	0.43346	78.82	1.4495	1.839	0.00030229	5.4834e-06	1.814	0.96491	0.0072145	0.74769	42.18	12.688	30.081	0.036535	0.010188	27.886	0.26696	0.038596	14.458	0	0	1
Buffer_GdC_90pls_5nm_2Hz_LSC91_1950pls_50nm_CaO_115pls_0,66nm_2Hz_0,1mbar_2_channel1.dat	0.1	4.5578e-06	0.00026435	6.3917e-06	1.6484e-08	0.2579	48.67	0.11264	0.23144	54.94	0.63943	1.1639	0.00026903	3.7175e-06	1.3818	0.97196	0.0047606	0.48979	16.75	1.2836	7.6633	0.025382	0.0033261	13.104	0.2899	0.01923	6.6333	0	0	1
Buffer_GdC_90pls_5nm_2Hz_LSC91_1950pls_50nm_CaO_115pls_0,66nm_2Hz_1mbar_2_channel1.dat	1	1.2208e-06	6.1038e-05	6.396e-06	8.2705e-09	0.12931	48.09	0.03014	0.062674	17.41	0.22347	1.2836	0.00024625	4.627e-06	1.879	0.94694	0.0054644	0.57706	3.232	0.23116	7.1522	0.0008912	0.00025517	28.632	0.62918	0.02848	4.5265	0	0	1
Buffer_GdC_90pls_5nm_2Hz_LSC91_1950pls_50nm_CaO_115pls_0,66nm_2Hz_10mbar_2_channel1.dat	10	3.3057e-06	0.00016529	6.4362e-06	1.4346e-08	0.2229	50.18	0.061388	0.12234	12.91	0.66466	5.1484	0.00021178	9.6851e-06	4.5732	0.97244	0.016341	1.6804	3.431	0.73914	21.543	0.0015666	0.00099374	63.433	0.57735	0.061353	10.627	0	0	1
Buffer_GdC_90pls_5nm_2Hz_LSC91_1950pls_50nm_CaO_115pls_0,66nm_2Hz_100mbar_2_channel1.dat	100	7.8076e-06	0.00034353	6.4126e-06	2.3459e-08	0.36583	50.43	0.14711	0.29171	7.055	1.8859	26.731	0.00023202	5.1073e-05	22.012	0.94883	0.072507	7.6417	4.299	2.2949	53.382	0.0021475	0.0025247	117.56	0.49966	0.1051	21.034	0	0	1
Model: C:\DATA\Docs\Mes_Documents\PLD\Modelecircuit.mdl	T (K)	Chi-Sqr	Sum-Sqr	L1(+)	L1(Error)	L1(Error%)	YSZ(+)	YSZ(Error)	YSZ(Error%)	R1(X)	R1(Error)	R1(Error%)	CPE1-T(X)	CPE1-T(Error)	CPE1-T(Error%)	CPE1-P(X)	CPE1-P(Error)	CPE1-P(Error%)	R2(+)	R2(Error)	R2(Error%)	CPE2-T(+)	CPE2-T(Error)	CPE2-T(Error%)	CPE2-P(+)	CPE2-P(Error)	CPE2-P(Error%)	R3(+)	R3(Error)	R3(Error%)	CPE3-T(+)	CPE3-T(Error)	CPE3-T(Error%)	CPE3-P(+)	CPE3-P(Error)	CPE3-P(Error%)
Buffer_GdC_90pls_5nm_2Hz_LSC91_1950pls_50nm_CaO_115pls_0,66nm_2Hz_T4_3_channel1.dat	772.734	1.4362e-05	0.00091918	4.6677e-06	1.158e-07	2.4809	234.6	0.6592	0.28099	0	0	0	0	0	0	1	0	0	1025	13.78	1.3444	0.00016755	1.0435e-06	0.6228	0.97856	0.0050135	0.51233	66.79	21.15	31.666	0.0032339	0.0011508	35.586	0.3564	0.041454	11.631
Buffer_GdC_90pls_5nm_2Hz_LSC91_1950pls_50nm_CaO_115pls_0,66nm_2Hz_T3_3_channel1.dat	800.324	3.7937e-06	0.00023521	5.8168e-06	3.4598e-08	0.59479	131.4	0.19853	0.15109	0	0	0	0	0	0	1	0	0	451.4	1.5654	0.34679	0.00019386	7.1902e-07	0.3709	0.96359	0.0018998	0.19716	22.92	1.6745	7.3058	0.0024685	0.00046944	19.017	0.40472	0.021451	5.3002
Buffer_GdC_90pls_5nm_2Hz_LSC91_1950pls_50nm_CaO_115pls_0,66nm_2Hz_T2_2_channel1.dat	824.224	6.297e-06	0.00039041	6.1192e-06	2.931e-08	0.47898	82.99	0.14405	0.17358	0	0	0	0	0	0	1	0	0	226.8	0.71225	0.31404	0.00023391	1.416e-06	0.60536	0.94533	0.0022196	0.2348	9.062	0.63085	6.9615	0.0017041	0.00051651	30.31	0.48207	0.032937	6.8324
Buffer_GdC_90pls_5nm_2Hz_LSC91_1950pls_50nm_CaO_115pls_0,66nm_2Hz_T1_2_channel1.dat	857.996	1.1274e-05	0.00066514	6.2482e-06	2.5249e-08	0.4041	46.94	0.21294	0.45364	3.312	0.44731	13.506	0.00025993	8.7048e-05	33.489	5.095	0.17199	3.3757	79.04	1.1507	1.4558	0.00028708	4.4653e-06	1.5554	0.97195	0.0058409	0.60095	63.5	31.079	48.943	0.041828	0.0099683	23.832	0.24424	0.033113	13.558

## Sheet: LSC91-SnO2
Model: C:\DATA\Docs\Mes_Documents\PLD\Modelecircuit.mdl	Chi-Sqr	Sum-Sqr	L1(+)	L1(Error)	L1(Error%)	YSZ(+)	YSZ(Error)	YSZ(Error%)	R1(+)	R1(Error)	R1(Error%)	CPE1-T(+)	CPE1-T(Error)	CPE1-T(Error%)	CPE1-P(+)	CPE1-P(Error)	CPE1-P(Error%)	R2(+)	R2(Error)	R2(Error%)	CPE2-T(+)	CPE2-T(Error)	CPE2-T(Error%)	CPE2-P(+)	CPE2-P(Error)	CPE2-P(Error%)	R3(+)	R3(Error)	R3(Error%)	CPE3-T(+)	CPE3-T(Error)	CPE3-T(Error%)	CPE3-P(+)	CPE3-P(Error)	CPE3-P(Error%)
C:\DATA\Docs\Mes_Documents\PLD\LSC91_decoration\Buffer_GdC_5nm_LSC91_50nm_CaO_restoration_780pls_20nm_2Hz_2_channel1.dat	1.3766e-06	8.1222e-05	6.3281e-06	8.5758e-09	0.13552	46.06	0.034646	0.075219	3.222	0.16468	5.1111	0.0018927	0.0004572	24.156	0.55574	0.024982	4.4953	11.76	0.31352	2.666	0.02508	0.00063227	2.521	0.97073	0.015803	1.628	36.18	0.30943	0.85525	0.00044857	5.8011e-06	1.2932	0.95295	0.0038638	0.40546
Buffer_GdC_5nm_LSC91_50nm_CaO_restoration_LSC91_20nm_SnO2_1pls_2_channel1.dat	2.5437e-06	0.00015517	6.3318e-06	1.1853e-08	0.1872	46.1	0.056936	0.12351	7.652	0.79433	10.381	0.043428	0.0053766	12.38	1.054	0.047838	4.5387	90.18	0.80454	0.89215	0.00045507	3.8509e-06	0.84622	0.9542	0.0030712	0.32186	3.879	0.2664	6.8677	0.0037836	0.0010682	28.232	0.48026	0.030117	6.271
Buffer_GdC_5nm_LSC91_50nm_CaO_restoration_LSC91_20nm_SnO2_2pls_2_channel1.dat	9.0143e-06	0.00057692	6.3676e-06	2.2268e-08	0.34971	44.63	0.27813	0.62319	39.11	24.514	62.68	0.073378	0.013853	18.879	0.18514	0.030303	16.368	135	0.8733	0.64689	0.00047319	3.3441e-06	0.70671	0.95637	0.0030223	0.31602	0			0			1
Buffer_GdC_5nm_LSC91_50nm_CaO_restoration_LSC91_20nm_SnO2_3pls_2_channel1.dat	1.782e-06	0.00011761	6.3353e-06	9.7125e-09	0.15331	45.28	0.045116	0.099638	3.869	0.16904	4.3691	0.0048881	0.00093107	19.048	0.46307	0.021383	4.6177	219.2	0.23068	0.10524	0.00047193	9.864e-07	0.20901	0.94644	0.00081538	0.086152	0			0			1
Buffer_GdC_5nm_LSC91_50nm_CaO_restoration_LSC91_20nm_SnO2_4pls_2_channel1.dat	6.1156e-06	0.0003914	6.3426e-06	1.8104e-08	0.28543	45.25	0.088571	0.19574	4.103	0.30463	7.4246	0.004886	0.0015912	32.567	0.45156	0.03679	8.1473	325.4	0.60378	0.18555	0.00048099	1.5495e-06	0.32215	0.94081	0.0012895	0.13706	0			0			1
Buffer_GdC_5nm_LSC91_50nm_CaO_restoration_LSC91_20nm_SnO2_5pls_2_channel1.dat	1.1374e-05	0.00072795	6.3336e-06	2.4201e-08	0.3821	44.92	0.10077	0.22433	3.225	0.27701	8.5895	0.0031103	0.0014881	47.844	0.50754	0.053419	10.525	421.1	0.97627	0.23184	0.00049757	1.9147e-06	0.38481	0.9321	0.0014604	0.15668	0			0			1
Active surface (cm²)	number of pulses	deposited thickness (nm)	eq monolayers	R	Cchem	ASR	kq	Co(Cchem)	T (K)			PO2	R	Cchem	ASR	kq	Co(Cchem)	T (K)		1000/T	T(K)	T(°C)	C	R	ASR	kq	Co(Cchem)
0.1492	0	0	0	36.18	0.000365988	5.39806	6.4255e-08	5.11799e+22	884.898			0.01	975.5	0.000521354	145.545	2.37976e-09	5.11819e+22	883.644		1.1694	855.137	582.137	0.000425594	565.7	84.4024	3.97129e-09	5.11805e+22
Co (dop)	1	0.111111	0.468823	90.18	0.000390403	13.4549	2.57767e-08	5.11802e+22	884.821			0.04	421.1	0.000444027	62.8281	5.53458e-09	5.11809e+22	887.132		1.19685	835.524	562.524	0.000367418	925.7	138.114	2.37121e-09	5.11796e+22
5.11696e+22	2	0.222222	0.937647	135	0.000417384	20.142	1.72751e-08	5.11806e+22	887.714			0.1	312.3	0.000380534	46.5952	7.39927e-09	5.11801e+22	879.587		1.24979	800.135	527.135	0.000303887	2307	344.204	9.11167e-10	5.11785e+22
Cv (dop)	3	0.333333	1.40647	219.2	0.000415068	32.7046	1.06238e-08	5.11806e+22	886.417			1	108.2	0.000334654	16.1434	2.13669e-08	5.11794e+22	880.008		1.2961	771.545	498.545	0.000271515	4623	689.752	4.3845e-10	5.11779e+22
4.29997e+20	4	0.444444	1.87529	325.4	0.000428018	48.5497	7.15701e-09	5.11807e+22	886.476			10	73.5	0.000310711	10.9662	3.12833e-08	5.1179e+22	875.222
	5	0.555556	2.34412	421.1	0.000444027	62.8281	5.53458e-09	5.11809e+22	887.132			100	43.59	0.000297411	6.50363	5.26248e-08	5.11788e+22	873.163
Model: C:\DATA\Docs\Mes_Documents\i-PLD\Modelecircuit.mdl	Chi-Sqr	Sum-Sqr	L1(+)	L1(Error)	L1(Error%)	YSZ(+)	YSZ(Error)	YSZ(Error%)	R1(+)	R1(Error)	R1(Error%)	CPE1-T(+)	CPE1-T(Error)	CPE1-T(Error%)	CPE1-P(+)	CPE1-P(Error)	CPE1-P(Error%)	R2(+)	R2(Error)	R2(Error%)	CPE2-T(+)	CPE2-T(Error)	CPE2-T(Error%)	CPE2-P(+)	CPE2-P(Error)	CPE2-P(Error%)	R3(X)	CPE3-T(X)	CPE3-P(X)
Buffer_GdC_5nm_LSC91_50nm_CaO_restoration_LSC91_20nm_SnO2_5pls_0,01mbar_2_channel1.dat	4.5539e-05	0.0030967	6.3412e-06	5.1685e-08	0.81507	46.72	0.30521	0.65327	4.134	0.83594	20.221	0.005886	0.0051068	86.762	0.41579	0.10051	24.173	975.5	4.0662	0.41683	0.00054873	2.7122e-06	0.49427	0.92431	0.0022316	0.24143	0	0	1
Buffer_GdC_5nm_LSC91_50nm_CaO_restoration_LSC91_20nm_SnO2_5pls_2_channel1.dat	1.1374e-05	0.00072795	6.3336e-06	2.4201e-08	0.3821	44.92	0.10077	0.22433	3.225	0.27701	8.5895	0.0031103	0.0014881	47.844	0.50754	0.053419	10.525	421.1	0.97627	0.23184	0.00049757	1.9147e-06	0.38481	0.9321	0.0014604	0.15668	0	0	1
Buffer_GdC_5nm_LSC91_50nm_CaO_restoration_LSC91_20nm_SnO2_5pls_0,1mbar_2_channel1.dat	6.0579e-06	0.00041194	6.3486e-06	1.9063e-08	0.30027	48.96	0.095783	0.19564	4.85	0.35941	7.4105	0.0046679	0.0014405	30.86	0.4449	0.034837	7.8303	312.3	0.52449	0.16794	0.0004295	1.4125e-06	0.32887	0.94317	0.0013202	0.13997	0	0	1
Buffer_GdC_5nm_LSC91_50nm_CaO_restoration_LSC91_20nm_SnO2_5pls_1mbar_2_channel1.dat	2.8245e-06	0.00016947	6.3869e-06	1.2903e-08	0.20202	48.72	0.060518	0.12422	5.581	0.3325	5.9577	0.0038118	0.00084109	22.065	0.46576	0.024099	5.1741	108.2	0.33079	0.30572	0.00038353	1.8262e-06	0.47616	0.95892	0.0018517	0.1931	0	0	1
Buffer_GdC_5nm_LSC91_50nm_CaO_restoration_LSC91_20nm_SnO2_5pls_10mbar_2_channel1.dat	2.3129e-06	0.00013415	6.4365e-06	1.1948e-08	0.18563	51.56	0.046572	0.090326	5.164	0.26836	5.1967	0.0024281	0.00051407	21.172	0.52431	0.023	4.3867	73.5	0.27084	0.36849	0.00034348	2.0808e-06	0.6058	0.97347	0.0021834	0.22429	0	0	1
Buffer_GdC_5nm_LSC91_50nm_CaO_restoration_LSC91_20nm_SnO2_5pls_100mbar_2_channel1.dat	1.9845e-06	0.00011113	6.4522e-06	1.1348e-08	0.17588	52.86	0.046367	0.087717	5.497	0.34034	6.1914	0.0023134	0.00051729	22.361	0.52324	0.023662	4.5222	43.59	0.31087	0.71317	0.00032242	2.9317e-06	0.90928	0.98142	0.0033734	0.34373	0	0	1
Model: C:\DATA\Docs\Mes_Documents\PLD\Modelecircuit.mdl	Chi-Sqr	Sum-Sqr	L1(+)	L1(Error)	L1(Error%)	YSZ(+)	YSZ(Error)	YSZ(Error%)	R1(+)	R1(Error)	R1(Error%)	CPE1-T(+)	CPE1-T(Error)	CPE1-T(Error%)	CPE1-P(+)	CPE1-P(Error)	CPE1-P(Error%)	R2(+)	R2(Error)	R2(Error%)	CPE2-T(+)	CPE2-T(Error)	CPE2-T(Error%)	CPE2-P(+)	CPE2-P(Error)	CPE2-P(Error%)
Buffer_GdC_5nm_LSC91_50nm_CaO_restoration_LSC91_20nm_SnO2_5pls_T1_2_channel1.dat	2.4813e-05	0.0016873	6.4912e-06	3.9004e-08	0.60088	49.06	0.18512	0.37733	3.782	0.44049	11.647	0.0025752	0.0017035	66.15	0.49111	0.073412	14.948	565.7	1.5605	0.27585	0.00047334	2.2998e-06	0.48587	0.92533	0.0018575	0.20074
Buffer_GdC_5nm_LSC91_50nm_CaO_restoration_LSC91_20nm_SnO2_5pls_T2_2_channel1.dat	1.4953e-05	0.0010168	6.4371e-06	3.8277e-08	0.59463	67.82	0.18503	0.27283	7.253	0.56225	7.752	0.0024491	0.00091933	37.537	0.46359	0.042931	9.2606	925.7	2.1246	0.22951	0.00039506	1.3197e-06	0.33405	0.93274	0.0014537	0.15585
Buffer_GdC_5nm_LSC91_50nm_CaO_restoration_LSC91_20nm_SnO2_5pls_T3_2_channel1.dat	1.881e-05	0.0013167	6.0492e-06	7.5158e-08	1.2424	131.9	0.31233	0.23679	21.03	1.2178	5.7908	0.0011939	0.00030637	25.661	0.47522	0.03088	6.498	2307	6.0833	0.26369	0.00031111	8.9572e-07	0.28791	0.93386	0.0015528	0.16628
Buffer_GdC_5nm_LSC91_50nm_CaO_restoration_LSC91_20nm_SnO2_5pls_T4_3_channel1.dat	3.3626e-05	0.0023538	4.7696e-06	1.7652e-07	3.7009	240.8	0.64545	0.26804	45.65	4.0072	8.7781	0.0011209	0.00032013	28.56	0.46504	0.037322	8.0255	4623	19.774	0.42773	0.00026766	8.7689e-07	0.32761	0.93709	0.0023002	0.24546

## Sheet: LSC91-SrO
Model: C:\DATA\Docs\Mes_Documents\PLD\Modelecircuit.mdl	deposited thickness (nm)	Chi-Sqr	Sum-Sqr	L1(+)	L1(Error)	L1(Error%)	YSZ(+)	YSZ(Error)	YSZ(Error%)	R1(+)	R1(Error)	R1(Error%)	CPE1-T(+)	CPE1-T(Error)	CPE1-T(Error%)	CPE1-P(+)	CPE1-P(Error)	CPE1-P(Error%)	R2(+)	R2(Error)	R2(Error%)	CPE2-T(+)	CPE2-T(Error)	CPE2-T(Error%)	CPE2-P(+)	CPE2-P(Error)	CPE2-P(Error%)	R3(+)	R3(Error)	R3(Error%)	CPE3-T(+)	CPE3-T(Error)	CPE3-T(Error%)	CPE3-P(+)	CPE3-P(Error)	CPE3-P(Error%)
Buffer_GdC_5nm_LSC91_50nm_CaO_restoration_LSC91_20nm_SnO2_5pls_restoration_1550pls_2_channel1.dat	0	1.1527e-06	7.0315e-05	6.4308e-06	8.2873e-09	0.12887	47.3	0.044702	0.094507	4.603	0.38596	8.385	0.0044689	0.001106	24.749	0.46265	0.025205	5.448	12.57	0.19909	1.5839	0.022953	0.00039343	1.7141	0.95214	0.0099638	1.0465	20.53	0.38003	1.8511	0.00063632	1.229e-05	1.9314	0.95093	0.0070603	0.74246
Buffer_GdC_5nm_LSC91_50nm_CaO_restoration_LSC91_20nm_SnO2_5pls_restoration_1550pls_SrO_3pls_2_channel1.dat	0.142857	2.0751e-06	0.00012658	6.3173e-06	1.1271e-08	0.17841	46.88	0.065108	0.13888	4.061	0.47254	11.636	0.0027267	0.0010855	39.81	0.48978	0.038906	7.9436	13.97	0.17403	1.2457	0.020497	0.00027264	1.3301	0.94199	0.0090683	0.96267	11.94	0.42104	3.5263	0.00056278	2.3746e-05	4.2194	0.93821	0.013442	1.4327
Buffer_GdC_5nm_LSC91_50nm_CaO_restoration_LSC91_20nm_SnO2_5pls_restoration_1550pls_SrO_6pls_2_channel1.dat	0.285714	1.6803e-06	0.0001025	6.301e-06	9.6784e-09	0.1536	47.12	0.039307	0.083419	2.956	0.24474	8.2794	0.0011445	0.00040945	35.775	0.59725	0.035282	5.9074	13.48	0.14956	1.1095	0.021228	0.00025314	1.1925	0.93681	0.0081272	0.86754	10.66	0.26803	2.5144	0.00056651	2.417e-05	4.2665	0.92535	0.011671	1.2613
Buffer_GdC_5nm_LSC91_50nm_CaO_restoration_LSC91_20nm_SnO2_5pls_restoration_1550pls_SrO_9pls_2_channel1.dat	0.428571	1.3529e-06	8.2528e-05	6.3154e-06	9.157e-09	0.14499	46.95	0.054512	0.11611	4.086	0.42922	10.505	0.002873	0.00097628	33.981	0.48513	0.033015	6.8054	13.39	0.14178	1.0588	0.021179	0.00023839	1.1256	0.94293	0.007576	0.80345	11.16	0.38108	3.4147	0.00064942	2.4322e-05	3.7452	0.91887	0.012383	1.3476
Buffer_GdC_5nm_LSC91_50nm_CaO_restoration_LSC91_20nm_SnO2_5pls_restoration_1550pls_SrO_12pls_2_channel1.dat	0.571429	2.1931e-06	0.00013378	6.3056e-06	1.1167e-08	0.1771	46.57	0.049933	0.10722	2.936	0.24274	8.2677	0.0011222	0.00044449	39.609	0.57995	0.038807	6.6914	12.93	0.19277	1.4909	0.021961	0.00034509	1.5714	0.94762	0.01022	1.0785	12.23	0.29153	2.3837	0.00072445	3.2284e-05	4.4563	0.89378	0.011864	1.3274
Buffer_GdC_5nm_LSC91_50nm_CaO_restoration_LSC91_20nm_SnO2_5pls_restoration_1550pls_SrO_15pls_2_channel1.dat	0.714286	2.9138e-06	0.00017774	6.3345e-06	1.4327e-08	0.22617	47.17	0.14714	0.31194	6.044	2.2859	37.821	0.011178	0.0075019	67.113	0.35814	0.064258	17.942	12.25	0.74835	6.109	0.023116	0.0010304	4.4575	0.96214	0.018403	1.9127	13.06	1.1733	8.9839	0.0007605	3.5128e-05	4.6191	0.92989	0.023154	2.49
Buffer_GdC_5nm_LSC91_50nm_CaO_restoration_LSC91_20nm_SnO2_5pls_restoration_1550pls_SrO_18pls_2_channel1.dat	0.857143	2.1524e-06	0.00012699	6.3084e-06	1.106e-08	0.17532	46.29	0.055772	0.12048	3.937	0.42167	10.71	0.0030961	0.0011075	35.771	0.49732	0.03597	7.2328	12.48	0.28416	2.2769	0.023423	0.00048881	2.0869	0.95056	0.014215	1.4954	15.93	0.46693	2.9311	0.00079483	2.7881e-05	3.5078	0.91586	0.011788	1.2871
Buffer_GdC_5nm_LSC91_50nm_CaO_restoration_LSC91_20nm_SnO2_5pls_restoration_1550pls_SrO_21pls_2_channel1.dat	1	1.4476e-06	8.8306e-05	6.3162e-06	9.4347e-09	0.14937	47.03	0.065094	0.13841	6.236	1.0098	16.193	0.0080789	0.0025362	31.393	0.40175	0.031328	7.7979	11.88	0.3068	2.5825	0.024063	0.00053471	2.2221	0.96167	0.011623	1.2086	17.41	0.67521	3.8783	0.00078456	1.9237e-05	2.4519	0.94316	0.011448	1.2138
	Active surface (cm²)	number of pulses	deposited thickness (nm)	eq monolayers	R	Cchem	kq	Co(Cchem)	T (K)			PO2	R	Cchem	ASR	kq	Co(Cchem)	T (K)			1000/T	T(K)	T(°C)	Cchem	R	ASR	kq	Co(Cchem)
	0.1492	0	0	0	20.53	0.000508699	1.12938e-07	5.11817e+22	882.565			0.01	42.06	0.000693186	6.27535	5.5021e-08	5.11837e+22	880.877			1.16879	855.583	582.583	0.000594327	16.89	2.51999	1.33081e-07	5.11825e+22
	Co (dop)	3	0.142857	0.587889	11.94	0.000404808	1.9436e-07	5.11804e+22	883.345			0.04	17.41	0.000605699	2.59757	1.33253e-07	5.11828e+22	883.065			1.2061	829.121	556.121	0.00047777	43.56	6.49915	5.00049e-08	5.1181e+22
	5.11696e+22	6	0.285714	1.17578	10.66	0.00037514	2.17588e-07	5.118e+22	882.898			0.1	11.6	0.000538995	1.73072	1.98236e-07	5.1182e+22	875.303			1.24223	805.004	532.004	0.000409689	106.1	15.8301	1.99326e-08	5.118e+22
	Cv (dop)	9	0.428571	1.76367	11.16	0.000420334	2.07914e-07	5.11806e+22	883.214			1	7.61	0.000445965	1.13541	3.03731e-07	5.11809e+22	879.815			1.29057	774.851	501.851	0.000372156	319.1	47.6097	6.37931e-09	5.11793e+22
	4.29997e+20	12	0.571429	2.35156	12.23	0.000413118	1.89877e-07	5.11805e+22	883.927			10	7.473	0.000431727	1.11497	3.09145e-07	5.11807e+22	879.378
		15	0.714286	2.93945	13.06	0.000537136	1.77584e-07	5.11821e+22	882.805			100	9.076	0.000405947	1.35414	2.53662e-07	5.11804e+22	876.331
		18	0.857143	3.52734	15.93	0.000532047	1.45862e-07	5.1182e+22	884.458
		21	1	4.11523	17.41	0.000605699	1.33253e-07	5.11828e+22	883.065
Model: C:\DATA\Docs\Mes_Documents\i-PLD\Modelecircuit.mdl	PO2	Chi-Sqr	Sum-Sqr	L1(+)	L1(Error)	L1(Error%)	YSZ(+)	YSZ(Error)	YSZ(Error%)	R1(+)	R1(Error)	R1(Error%)	CPE1-T(+)	CPE1-T(Error)	CPE1-T(Error%)	CPE1-P(+)	CPE1-P(Error)	CPE1-P(Error%)	R2(+)	R2(Error)	R2(Error%)	CPE2-T(+)	CPE2-T(Error)	CPE2-T(Error%)	CPE2-P(+)	CPE2-P(Error)	CPE2-P(Error%)	R3(+)	R3(Error)	R3(Error%)	CPE3-T(+)	CPE3-T(Error)	CPE3-T(Error%)	CPE3-P(+)	CPE3-P(Error)	CPE3-P(Error%)
Buffer_GdC_5nm_LSC91_50nm_CaO_restoration_LSC91_20nm_SnO2_5pls_restoration_1550pls_SrO_21pls_0.01mbar_3_channel1.dat	0.01	3.7872e-06	0.00024617	6.3355e-06	1.5147e-08	0.23908	48.23	0.15674	0.32498	33.1	1.6216	4.8991	0.026125	0.00090649	3.4698	0.99797	0.016581	1.6615	42.06	0.57139	1.3585	0.0007987	1.1345e-05	1.4204	0.95992	0.0054722	0.57007	28.15	9.2731	32.942	0.048241	0.0069731	14.455	0.21697	0.019493	8.9842
Buffer_GdC_5nm_LSC91_50nm_CaO_restoration_LSC91_20nm_SnO2_5pls_restoration_1550pls_SrO_21pls_2_channel1.dat	0.04	1.4476e-06	8.8306e-05	6.3162e-06	9.4348e-09	0.14937	47.03	0.065094	0.13841	11.88	0.3068	2.5825	0.024063	0.00053471	2.2221	0.96167	0.011623	1.2086	17.41	0.67521	3.8783	0.00078456	1.9237e-05	2.4519	0.94316	0.011448	1.2138	6.236	1.0098	16.193	0.0080789	0.0025362	31.393	0.40175	0.031328	7.7979
Buffer_GdC_5nm_LSC91_50nm_CaO_restoration_LSC91_20nm_SnO2_5pls_restoration_1550pls_SrO_21pls_0.1mbar_3_channel1.dat	0.1	2.5245e-06	0.00013885	6.3153e-06	1.3623e-08	0.21571	51.51	0.1163	0.22578	4.448	1.2094	27.19	0.025378	0.0033595	13.238	1.018	0.070272	6.9029	11.6	1.5439	13.309	0.00073021	4.623e-05	6.3311	0.94017	0.030471	3.241	8.876	3.4273	38.613	0.0092071	0.004686	50.896	0.37159	0.048133	12.953
Buffer_GdC_5nm_LSC91_50nm_CaO_restoration_LSC91_20nm_SnO2_5pls_restoration_1550pls_SrO_21pls_1mbar__channel1.dat	1	1.0088e-06	5.4476e-05	6.296e-06	7.6957e-09	0.12223	48.83	0.033805	0.06923	7.61	0.52178	6.8565	0.0006887	2.6135e-05	3.7948	0.92357	0.019235	2.0827	5.113	0.58106	11.364	0.002042	0.00050189	24.578	0.53492	0.023934	4.4743	0	0	0	0	0	0	1	0	0
Buffer_GdC_5nm_LSC91_50nm_CaO_restoration_LSC91_20nm_SnO2_5pls_restoration_1550pls_SrO_21pls_10mbar_2_channel1.dat	10	6.7351e-07	3.3675e-05	6.2178e-06	6.1749e-09	0.09931	49.08	0.023336	0.047547	4.829	0.3625	7.5067	0.0014997	0.00028484	18.993	0.58212	0.018982	3.2608	7.473	0.3253	4.353	0.00044066	1.3864e-05	3.1462	0.99643	0.013214	1.3261	0	0	0	0	0	0	1	0	0
Buffer_GdC_5nm_LSC91_50nm_CaO_restoration_LSC91_20nm_SnO2_5pls_restoration_1550pls_SrO_21pls_100mbar_3_channel1.dat	100	3.8067e-06	0.00019034	6.2591e-06	1.511e-08	0.24141	50.88	0.06167	0.12121	5.871	1.2481	21.259	0.0029962	0.0011452	38.222	0.50535	0.037333	7.3876	9.076	1.0302	11.351	0.0004088	3.2809e-05	8.0257	0.99875	0.033677	3.3719	0	0	0	0	0	0	1	0	0
Model: C:\DATA\Docs\Mes_Documents\i-PLD\Modelecircuit.mdl	T (K)	Chi-Sqr	Sum-Sqr	L1(+)	L1(Error)	L1(Error%)	YSZ(+)	YSZ(Error)	YSZ(Error%)	R1(+)	R1(Error)	R1(Error%)	CPE1-T(+)	CPE1-T(Error)	CPE1-T(Error%)	CPE1-P(+)	CPE1-P(Error)	CPE1-P(Error%)	R2(+)	R2(Error)	R2(Error%)	CPE2-T(+)	CPE2-T(Error)	CPE2-T(Error%)	CPE2-P(+)	CPE2-P(Error)	CPE2-P(Error%)	R3(+)	R3(Error)	R3(Error%)	CPE3-T(+)	CPE3-T(Error)	CPE3-T(Error%)	CPE3-P(+)	CPE3-P(Error)	CPE3-P(Error%)
Buffer_GdC_5nm_LSC91_50nm_CaO_restoration_LSC91_20nm_SnO2_5pls_restoration_1550pls_SrO_21pls_T1_2_channel1.dat	855.583	3.141e-06	0.0001916	6.1597e-06	1.3744e-08	0.22313	48.72	0.10314	0.2117	11.41	1.5242	13.358	0.024385	0.0019319	7.9225	1.002	0.037715	3.764	16.89	0.8984	5.3191	0.00072673	2.6041e-05	3.5833	0.95629	0.014059	1.4702	10.27	3.4485	33.578	0.020152	0.0063953	31.735	0.31594	0.032026	10.137
Buffer_GdC_5nm_LSC91_50nm_CaO_restoration_LSC91_20nm_SnO2_5pls_restoration_1550pls_SrO_21pls_T2_2_channel1.dat	829.121	1.9795e-06	0.00012867	6.0889e-06	1.539e-08	0.25276	75.94	0.098938	0.13028	12.7	0.86137	6.7824	0.022294	0.0012917	5.7939	1.024	0.025746	2.5143	43.56	1.2085	2.7743	0.00060212	1.1926e-05	1.9807	0.94026	0.0086081	0.9155	16.35	2.1289	13.021	0.0061024	0.0011552	18.93	0.37162	0.019669	5.2928
Buffer_GdC_5nm_LSC91_50nm_CaO_restoration_LSC91_20nm_SnO2_5pls_restoration_1550pls_SrO_21pls_T3_2_channel1.dat	805.004	5.1101e-06	0.00033727	5.7872e-06	3.4786e-08	0.60109	119.7	0	0	106.1	3.9484	3.7214	0.00050698	1.172e-05	2.3117	0.93205	0.012757	1.3687	8.853	2.2509	25.425	0.034806	0.011284	32.42	1.117	0.087492	7.8328	25.06	2.6705	10.656	0.0022272	0.00035317	15.857	0.45392	0.015389	3.3902
Buffer_GdC_5nm_LSC91_50nm_CaO_restoration_LSC91_20nm_SnO2_5pls_restoration_1550pls_SrO_21pls_T4_2_channel1.dat	774.851	1.5102e-05	0.0009967	4.6889e-06	1.1021e-07	2.3504	224	0	0	57.16	16.915	29.592	0.00091104	0.0004361	47.868	0.57902	0.09366	16.176	319.1	13.337	4.1796	0.00040645	1.1218e-05	2.76	0.95863	0.01255	1.3092	4.648	3.1912	68.657	4.8442e-05	0.00011884	245.32	0.76339	0.23112	30.275

## Sheet: LSC91-Decorations
	SrO	SnO2	CaO
	18	9	176	p/nm
	23	9	173	p/nm
	24	9	175	p/nm
	19	9	169	p/nm
	22			p/nm
mean value	21.2	9	173.25	p/nm
standard deviation	2.94392	0	3.0957	0.323029

[truncated: 5 more sheets: LSC95-5, LSC95-5-CaO, LSC95-5-SnO2, LSC95-5-SrO, LSC95-5-Decoration]
