# Supplementary material for: Oxygen surface exchange kinetics of La1−xSrxCoO3–δ thin-films decorated with binary oxides: links between acidity, strontium doping, and reaction kinetics
Source: Royal Society of Chemistry journal article supplement (doi:10.1039/d3ta07422f), 2024-01-01
Supplement: d3ta07422f2.xlsx [file d3ta07422f2.xlsx]

## Sheet: Feuil1
	Inc: BLANC 13/02/2023 10:48:54 RI Information ID1: Information ID2: Information ID3:										La (261 nm)	La (419,6 nm)	Co (238,8 nm)	Co (237,8 nm)	Sr	Co mean value	La mean value
	Co2378	Co2388	La2610	La4196	Sr3464					standard addition concentration (mol.L-1)	0.000333283	0.000333283	0.000314246	0.000314246	0.000105675
Unités	Cps/S	Cps/S	Cps/S	Cps/S	Cps/S				A1/A2	LSC95 + standard (concentration mol.L-1)	0.549226	0.544681	0.574029	0.577845	0.164392
Moyenne	-10.41	3.306	2.767	-1.238	10.79					LSC91 + standard (concentration mol.L-1)	0.528591	0.525316	0.570054	0.572637	0.280896
EcartType	1.78	1.346	1.193	5.567	2.4					LSC82 + standard (concentration mol.L-1)	0.498615	0.496535	0.56596	0.569308	0.438101			Sr	La	Co
CV %	17.07	40.71	43.11	449.9	22.2					n LSC95 (mol)	0.000406075	0.000398693	0.000423471	0.00043014	2.07898e-05	0.000426806	0.000402384	0.0487103	0.941487	0.99149
Rép #1	-9.841	2.918	1.83	-6.933	12.39					n LSC91 (mol)	0.00037371	0.000368833	0.000416651	0.000421068	4.12788e-05	0.000418859	0.000371271	0.0985504	0.885231	0.984937
Rép #2	-8.341	5.268	2.53	0.85	12.16					n LSC82 (mol)	0.000331442	0.000328695	0.000409757	0.000415384	8.23929e-05	0.00041257	0.000330069	0.199706	0.808874	0.999736
Rép #3	-12.56	2.209	2.205	5.55	11.34													Sr	La
Rép #4	-10.88	2.827	4.505	-4.417	7.259									Co standard deviation	Uncertainty (2σ)	Uncertainty % (2σ)		4.91284	95.0872
	Inc: sample91 13/02/2023 10:50:46 RI Information ID1: Information ID2: Information ID3:													4.7153e-06	0.0220958	2.20958		10.0058	89.9942
	Co2378	Co2388	La2610	La4196	Sr3464									3.12305e-06	0.0149122	1.49122		19.9759	80.0241
Unités	Cps/S	Cps/S	Cps/S	Cps/S	Cps/S									3.97901e-06	0.0192889	1.92889
Moyenne	19030	34370	14860	113100	8988									La standard deviation		Uncertainty % (2σ)
EcartType	180	325	133	1362	77									5.21963e-06	0.0259436	2.59436
CV %	0.9477	0.945	0.8969	1.205	0.8604									3.44895e-06	0.0185791	1.85791
Rép #5	18810	33990	14710	111400	8935									1.94191e-06	0.0117667	1.17667
Rép #6	19090	34510	14920	113400	8972
Rép #7	18980	34250	14800	112800	8944
Rép #8	19240	34740	15010	114700	9102
	Inc: sample91-AD 13/02/2023 10:52:35 RI Information ID1: Information ID2: Information ID3:
	Co2378	Co2388	La2610	La4196	Sr3464
Unités	Cps/S	Cps/S	Cps/S	Cps/S	Cps/S
Moyenne	33240	60290	28110	215300	31970
EcartType	251	385	211	1578	210
CV %	0.7536	0.6389	0.7517	0.7329	0.6555
Rép #9	33560	60570	28330	216400	32100
Rép #10	33330	60680	28250	216800	32190
Rép #11	33020	59920	27900	213400	31800
Rép #12	33070	60010	27970	214500	31770
	Inc: BLANC 13/02/2023 10:54:24 RI Information ID1: Information ID2: Information ID3:
	Co2378	Co2388	La2610	La4196	Sr3464
Unités	Cps/S	Cps/S	Cps/S	Cps/S	Cps/S
Moyenne	12.7	43.64	22.47	139.4	27.86
EcartType	15.82	28.97	13.44	93.7	13.59
CV %	124.5	66.4	59.83	67.18	48.79
Rép #13	35.87	85.96	42.25	276.2	46.86
Rép #14	9.736	38.65	19.38	124	28
Rép #15	3.327	23.4	15.1	78.02	20.49
Rép #16	1.882	26.53	13.14	79.42	16.08
	Inc: sample82 13/02/2023 10:56:17 RI Information ID1: Information ID2: Information ID3:
	Co2378	Co2388	La2610	La4196	Sr3464
Unités	Cps/S	Cps/S	Cps/S	Cps/S	Cps/S
Moyenne	18730	33620	13070	98980	17750
EcartType	34	164	38	600	46
CV %	0.181	0.487	0.289	0.6062	0.2601
Rép #17	18760	33750	13100	99210	17800
Rép #18	18750	33430	13030	98360	17710
Rép #19	18690	33550	13040	98640	17710
Rép #20	18700	33770	13110	99710	17780
	Inc: sample82-AD 13/02/2023 10:58:07 RI Information ID1: Information ID2: Information ID3:
	Co2378	Co2388	La2610	La4196	Sr3464
Unités	Cps/S	Cps/S	Cps/S	Cps/S	Cps/S
Moyenne	32890	59370	26190	199200	40480
EcartType	158	372	165	1482	208
CV %	0.4789	0.6263	0.6292	0.744	0.5127
Rép #21	32660	58970	25980	197200	40190
Rép #22	33000	59740	26360	200200	40610
Rép #23	32960	59620	26270	200500	40650
Rép #24	32930	59140	26160	198700	40470
	Inc: BLANC 13/02/2023 10:59:56 RI Information ID1: Information ID2: Information ID3:
	Co2378	Co2388	La2610	La4196	Sr3464
Unités	Cps/S	Cps/S	Cps/S	Cps/S	Cps/S
Moyenne	7.302	35.45	18.5	113.2	34.5
EcartType	11.65	15.45	7.77	57.9	11.99
CV %	159.6	43.6	42	51.19	34.75
Rép #25	21.93	56.6	28.32	186.1	48.97
Rép #26	11.37	37.32	21.16	131.9	39.62
Rép #27	-1.091	24.2	12.28	77.72	23.27
Rép #28	-3.005	23.66	12.26	57.07	26.15
	Inc: sample95 13/02/2023 11:01:51 RI Information ID1: Information ID2: Information ID3:
	Co2378	Co2388	La2610	La4196	Sr3464
Unités	Cps/S	Cps/S	Cps/S	Cps/S	Cps/S
Moyenne	19280	34520	15870	119500	4497
EcartType	47	156	83	485	33
CV %	0.2445	0.4524	0.5202	0.4056	0.7245
Rép #29	19300	34680	15970	119900	4535
Rép #30	19340	34610	15910	119600	4512
Rép #31	19260	34330	15780	118800	4477
Rép #32	19240	34470	15820	119600	4464
	Inc: sample95-AD 13/02/2023 11:03:41 RI Information ID1: Information ID2: Information ID3:
	Co2378	Co2388	La2610	La4196	Sr3464
Unités	Cps/S	Cps/S	Cps/S	Cps/S	Cps/S
Moyenne	33360	60110	28880	219300	27180
EcartType	337	717	331	3009	272
CV %	1.01	1.192	1.145	1.372	1.002
Rép #33	33120	59580	28660	216400	26970
Rép #34	33730	60910	29210	222600	27500
Rép #35	33560	60510	29120	221100	27330
Rép #36	33030	59430	28550	217100	26950
